# Supplementary material for: Selective crystallization of four bis(phthalocyaninato)lanthanoid( iii ) polymorphs
Source: Royal Society of Chemistry journal article supplement (doi:10.1039/d1ce00936b), 2021-01-01
Supplement: d1ce00936b1.pdf [file d1ce00936b1.pdf]

*Supporting Information*

**Selective Crystallization of Four Bis(phthalocyaninato)lanthanoid(III) Polymorphs**

Maegan Dailey and Claire Besson

|                                                                                                                         |         |
|-------------------------------------------------------------------------------------------------------------------------|---------|
| <b>Table S1.</b> Crystallographic parameters for the LaPc <sub>2</sub> polymorphs.....                                  | page 3  |
| <b>Figure S1.</b> Thermal ellipsoid plot for the LaPc <sub>2</sub> α-phase.....                                         | page 3  |
| <b>Figure S2.</b> Thermal ellipsoid plot for the LaPc <sub>2</sub> ·CH <sub>2</sub> Cl <sub>2</sub> solvate phase.....  | page 3  |
| <b>Table S2.</b> Crystallographic parameters for the PrPc <sub>2</sub> polymorphs.....                                  | page 4  |
| <b>Figure S3.</b> Thermal ellipsoid plot for the PrPc <sub>2</sub> δ-phase.....                                         | page 4  |
| <b>Figure S4.</b> Thermal ellipsoid plot for the PrPc <sub>2</sub> ·CH <sub>2</sub> Cl <sub>2</sub> solvate phase.....  | page 4  |
| <b>Figure S5.</b> Purification of NdPc <sub>2</sub> .....                                                               | page 5  |
| <b>Table S3.</b> Crystallographic parameters for the NdPc <sub>2</sub> polymorphs.....                                  | page 6  |
| <b>Figure S6.</b> Skew angle calculation example.....                                                                   | page 7  |
| <b>Table S4.</b> Geometric parameters of the different NdPc <sub>2</sub> polymorphs.....                                | page 7  |
| <b>Figure S7.</b> Reflection data showing the lack of a supercell for NdPc <sub>2</sub> .....                           | page 8  |
| <b>Figure S8.</b> Thermal ellipsoid plot for the NdPc <sub>2</sub> α-phase.....                                         | page 9  |
| <b>Figure S9.</b> Hirshfeld surface for the NdPc <sub>2</sub> β-phase.....                                              | page 9  |
| <b>Figure S10.</b> Thermal ellipsoid plot for the NdPc <sub>2</sub> γ-phase.....                                        | page 10 |
| <b>Figure S11.</b> Hirshfeld surface for the NdPc <sub>2</sub> γ-phase.....                                             | page 10 |
| <b>Figure S12.</b> Redox titration for the NdPc <sub>2</sub> γ-phase.....                                               | page 11 |
| <b>Figure S13.</b> Thermal ellipsoid plot for the NdPc <sub>2</sub> δ-phase.....                                        | page 11 |
| <b>Figure S14.</b> Hirshfeld surface for the NdPc <sub>2</sub> δ-phase.....                                             | page 12 |
| <b>Figure S15.</b> Redox titration for the NdPc <sub>2</sub> δ-phase.....                                               | page 12 |
| <b>Figure S16.</b> Thermal ellipsoid plot for the NdPc <sub>2</sub> ·CH <sub>2</sub> Cl <sub>2</sub> solvate phase..... | page 13 |
| <b>Figure S17.</b> Hirshfeld surface for the NdPc <sub>2</sub> ·CH <sub>2</sub> Cl <sub>2</sub> solvate phase.....      | page 13 |
| <b>Figure S18.</b> Redox titration for the NdPc <sub>2</sub> ·CH <sub>2</sub> Cl <sub>2</sub> solvate phase.....        | page 14 |
| <b>Figure S19.</b> Energy as a function of skew angle for NdPc <sub>2</sub> .....                                       | page 15 |
| <b>Table S5.</b> Crystallographic parameters for the SmPc <sub>2</sub> polymorphs.....                                  | page 16 |
| <b>Figure S20.</b> Thermal ellipsoid plot for the SmPc <sub>2</sub> γ-phase.....                                        | page 16 |
| <b>Figure S21.</b> Thermal ellipsoid plot for the SmPc <sub>2</sub> δ-phase.....                                        | page 17 |
| <b>Figure S22.</b> Thermal ellipsoid plot for the SmPc <sub>2</sub> ·CH <sub>2</sub> Cl <sub>2</sub> solvate phase..... | page 17 |
| <b>Figure S23.</b> Energy as a function of skew angle for SmPc <sub>2</sub> .....                                       | page 18 |
| <b>Figure S24.</b> Redox titration for the SmPc <sub>2</sub> ·CH <sub>2</sub> Cl <sub>2</sub> solvate phase.....        | page 18 |
| <b>Table S6.</b> Crystallographic parameters for GdPc <sub>2</sub> polymorphs.....                                      | page 19 |
| <b>Figure S25.</b> Thermal ellipsoid plot for the GdPc <sub>2</sub> γ-phase.....                                        | page 19 |
| <b>Figure S26.</b> Thermal ellipsoid plot for the GdPc <sub>2</sub> δ-phase.....                                        | page 20 |
| <b>Figure S27.</b> Thermal ellipsoid plot for the GdPc <sub>2</sub> ·CH <sub>2</sub> Cl <sub>2</sub> solvate phase..... | page 20 |
| <b>Figure S28.</b> Energy as a function of skew angle for GdPc <sub>2</sub> .....                                       | page 21 |

|                                                                                                                           |         |
|---------------------------------------------------------------------------------------------------------------------------|---------|
| <b>Table S7.</b> Crystallographic parameters for the TbPc <sub>2</sub> polymorphs.....                                    | page 22 |
| <b>Figure S29.</b> Thermal ellipsoid plot for the TbPc <sub>2</sub> γ-phase.....                                          | page 22 |
| <b>Figure S30.</b> Thermal ellipsoid plot for the TbPc <sub>2</sub> δ-phase.....                                          | page 23 |
| <b>Figure S31.</b> Thermal ellipsoid plot for the TbPc <sub>2</sub> ·CH <sub>2</sub> Cl <sub>2</sub> solvate phase.....   | page 23 |
| <b>Table S8.</b> Crystallographic parameters for the DyPc <sub>2</sub> polymorphs.....                                    | page 24 |
| <b>Figure S32.</b> Thermal ellipsoid plot for the DyPc <sub>2</sub> α-phase.....                                          | page 24 |
| <b>Figure S33.</b> Thermal ellipsoid plot for the DyPc <sub>2</sub> γ-phase.....                                          | page 25 |
| <b>Figure S34.</b> Thermal ellipsoid plot for the DyPc <sub>2</sub> ·CH <sub>2</sub> Cl <sub>2</sub> solvate phase.....   | page 25 |
| <b>Table S9.</b> Crystallographic parameters for the ErPc <sub>2</sub> CH <sub>2</sub> Cl <sub>2</sub> solvate phase..... | page 26 |
| <b>Figure S35.</b> Thermal ellipsoid plot for the ErPc <sub>2</sub> ·CH <sub>2</sub> Cl <sub>2</sub> solvate phase.....   | page 26 |
| <b>Table S10.</b> Crystallographic parameters for the YbPc <sub>2</sub> polymorphs.....                                   | page 27 |
| <b>Figure S36.</b> Thermal ellipsoid plot for the YbPc <sub>2</sub> γ-phase.....                                          | page 27 |
| <b>Figure S37.</b> Thermal ellipsoid plot for the YbPc <sub>2</sub> ·CH <sub>2</sub> Cl <sub>2</sub> solvate phase.....   | page 27 |
| <b>Table S11.</b> Bond lengths for α-LnPc <sub>2</sub> .....                                                              | page 28 |
| <b>Table S12.</b> Bond lengths for γ-LnPc <sub>2</sub> .....                                                              | page 29 |
| <b>Table S13.</b> Bond lengths for δ-LnPc <sub>2</sub> .....                                                              | page 36 |
| <b>Table S14.</b> Bond lengths for LnPc <sub>2</sub> ·CH <sub>2</sub> Cl <sub>2</sub> solvate phase.....                  | page 42 |

**Table S1.** Crystallographic Parameters for the LaPc<sub>2</sub> Polymorphs

|                              | $\alpha$ -Phase <sup>a</sup>                       | CH <sub>2</sub> Cl <sub>2</sub> Solvate Phase                                      |
|------------------------------|----------------------------------------------------|------------------------------------------------------------------------------------|
| Chemical Formula             | C <sub>64</sub> H <sub>32</sub> N <sub>16</sub> La | C <sub>64</sub> H <sub>32</sub> N <sub>16</sub> La·CH <sub>2</sub> Cl <sub>2</sub> |
| Crystal System               | Tetragonal                                         | Orthorhombic                                                                       |
| Z                            | 2                                                  | 4                                                                                  |
| Space Group                  | <i>P4/nnc</i>                                      | <i>Pnma</i>                                                                        |
| a (Å)                        | 19.9227(6)                                         | 28.0409(9)                                                                         |
| b (Å)                        | 19.9227(6)                                         | 22.9440(7)                                                                         |
| c (Å)                        | 6.3925(4)                                          | 7.8783(2)                                                                          |
| $\alpha$ (°)                 | 90.0                                               | 90.0                                                                               |
| $\beta$ (°)                  | 90.0                                               | 90.0                                                                               |
| $\gamma$ (°)                 | 90.0                                               | 90.0                                                                               |
| V (Å <sup>3</sup> )          | 2537.27                                            | 5068.67                                                                            |
| Density (g/cm <sup>3</sup> ) | 1.524                                              | 1.637                                                                              |
| R-factor (%)                 | 8.03                                               | 3.01                                                                               |
| CCDC Number                  | 2096854                                            | 2096857                                                                            |

<sup>a</sup> There is a small residual electronic density peak at coordinates ( $\frac{1}{4}$ ,  $\frac{1}{4}$ ,  $\frac{3}{4}$ ), mirroring the La center with respect to the phthalocyanine ring. This suggests some La disorder between two positions shifted along the LaPc<sub>2</sub> stack by the Pc-Pc distance, as was observed in the neodymium case. Attempts to refine this model, however, converged to occupancy factors of less than 1% for the additional La site with no significant improvement of the R-factors, and where thus abandoned.

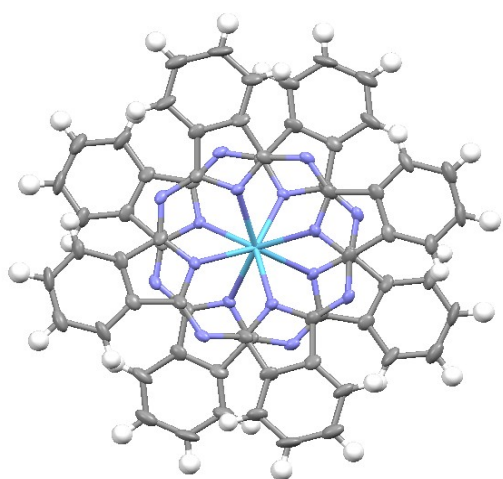

**Figure S1.** Thermal ellipsoid plot for the LaPc<sub>2</sub>  $\alpha$ -phase. Ellipsoids shown at 50% probability (La: light blue, C: grey, N: blue, H: white).

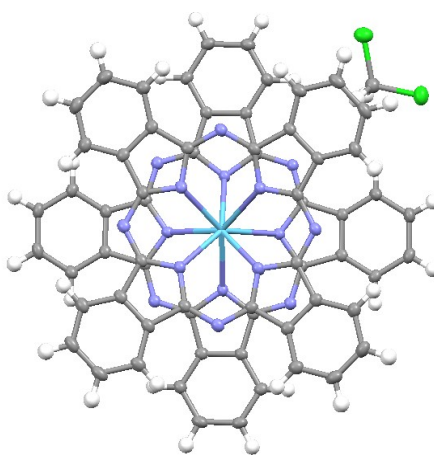

**Figure S2.** Thermal ellipsoid plot for the LaPc<sub>2</sub>·CH<sub>2</sub>Cl<sub>2</sub> phase. Ellipsoids shown at 50% probability (La: light blue, C: grey, N: blue, Cl: bright green, H: white).

**Table S2.** Crystallographic Parameters for PrPc<sub>2</sub> Polymorphs

|                              | $\delta$ -Phase                                    | CH <sub>2</sub> Cl <sub>2</sub> Solvate Phase                                      |
|------------------------------|----------------------------------------------------|------------------------------------------------------------------------------------|
| Chemical Formula             | C <sub>64</sub> H <sub>32</sub> N <sub>16</sub> Pr | C <sub>64</sub> H <sub>32</sub> N <sub>16</sub> Pr·CH <sub>2</sub> Cl <sub>2</sub> |
| Crystal System               | Monoclinic                                         | Orthorhombic                                                                       |
| Z                            | 4                                                  | 4                                                                                  |
| Space Group                  | <i>C2/c</i>                                        | <i>Pnma</i>                                                                        |
| a (Å)                        | 28.106(3)                                          | 28.1128(16)                                                                        |
| b (Å)                        | 14.1593(10)                                        | 22.9663(14)                                                                        |
| c (Å)                        | 13.1975(8)                                         | 7.8883(5)                                                                          |
| $\alpha$ (°)                 | 90.0                                               | 90.0                                                                               |
| $\beta$ (°)                  | 115.551(4)                                         | 90.0                                                                               |
| $\gamma$ (°)                 | 90.0                                               | 90.0                                                                               |
| V (Å <sup>3</sup> )          | 4738.45                                            | 5093.06                                                                            |
| Density (g/cm <sup>3</sup> ) | 1.634                                              | 1.631                                                                              |
| R-factor (%)                 | 2.68                                               | 2.94                                                                               |
| CCDC Number                  | 2096858                                            | 2096859                                                                            |

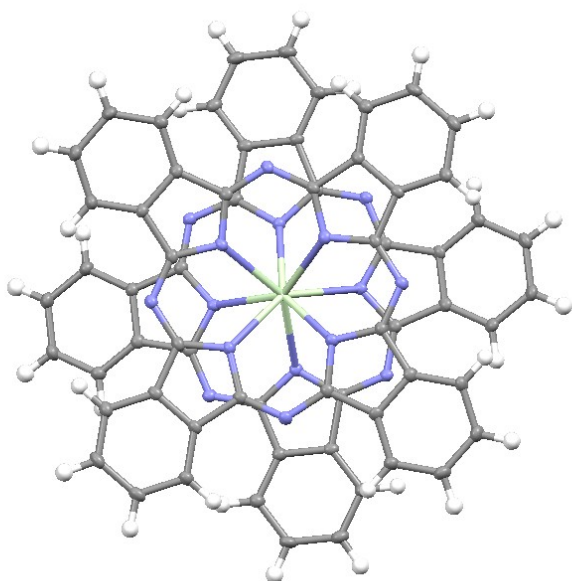**Figure S3.** Thermal ellipsoid plot for the PrPc<sub>2</sub>  $\delta$ -phase. Ellipsoids shown at 50% probability (Pr: yellow-green, C: grey, N: blue, H: white).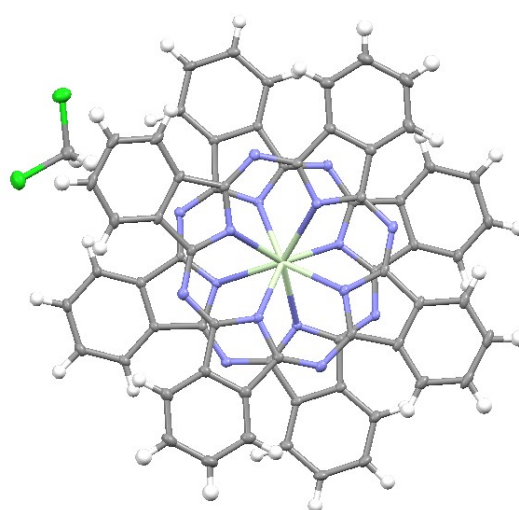**Figure S4.** Thermal ellipsoid plot for the PrPc<sub>2</sub>·CH<sub>2</sub>Cl<sub>2</sub> solvate phase. Ellipsoids shown at 50% probability (Pr: yellow-green, C: grey, N: blue, Cl: bright green, H: white).

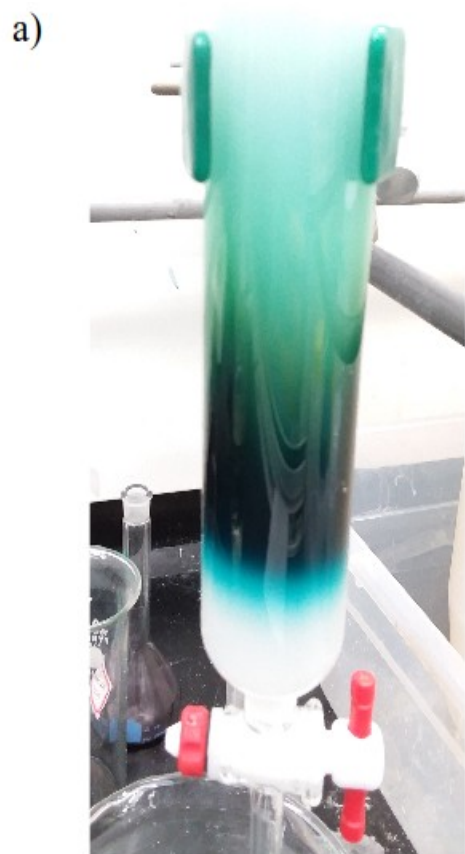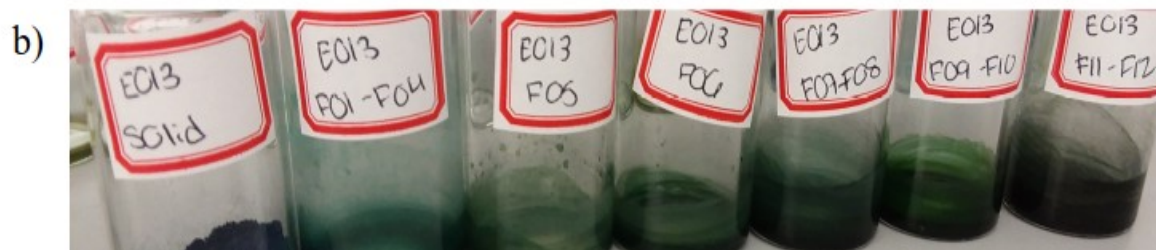

**Figure S5.** a) Purification of  $\text{NdPc}_2$  and  $\text{NdPc}_2^-$  by column chromatography showing blue ( $\text{NdPc}_2^-$ ) and green ( $\text{NdPc}_2$ ) bands b) Resulting fractions.

**Table S3.** Crystallographic parameters for the NdPc<sub>2</sub> polymorphs

|                              | $\alpha$ -Phase <sup>a</sup>                       | $\beta$ -Phase <sup>b</sup>                        | $\gamma$ -Phase <sup>c</sup>                       | $\delta$ -Phase                                    | CH <sub>2</sub> Cl <sub>2</sub> Solvate Phase                                      |
|------------------------------|----------------------------------------------------|----------------------------------------------------|----------------------------------------------------|----------------------------------------------------|------------------------------------------------------------------------------------|
| Chemical Formula             | C <sub>64</sub> H <sub>32</sub> N <sub>16</sub> Nd | C <sub>64</sub> H <sub>32</sub> N <sub>16</sub> Nd·CH <sub>2</sub> Cl <sub>2</sub> |
| Crystal System               | Tetragonal                                         | Monoclinic                                         | Orthorhombic                                       | Monoclinic                                         | Orthorhombic                                                                       |
| Z                            | 2                                                  | 4                                                  | 4                                                  | 4                                                  | 4                                                                                  |
| Space Group                  | <i>P4/nnc</i>                                      | <i>C2/c</i>                                        | <i>P2<sub>1</sub>2<sub>1</sub>2<sub>1</sub></i>    | <i>C2/c</i>                                        | <i>Pnma</i>                                                                        |
| a (Å)                        | 19.937(5)                                          | 19.010                                             | 8.852(2)                                           | 28.103(3)                                          | 28.085(16)                                                                         |
| b (Å)                        | 19.937(5)                                          | 19.066                                             | 10.604(2)                                          | 14.175(13)                                         | 22.964(13)                                                                         |
| c (Å)                        | 6.420(16)                                          | 15.538                                             | 50.844(12)                                         | 13.185(12)                                         | 7.890(4)                                                                           |
| $\alpha$ (°)                 | 90.0                                               | 90.0                                               | 90.0                                               | 90.0                                               | 90.0                                                                               |
| $\beta$ (°)                  | 90.0                                               | 116.1                                              | 90.0                                               | 115.596(2)                                         | 90.0                                                                               |
| $\gamma$ (°)                 | 90.0                                               | 90.0                                               | 90.0                                               | 90.0                                               | 90.0                                                                               |
| V (Å <sup>3</sup> )          | 2551.93                                            | 5057.39                                            | 4772.5(19)                                         | 4737.0(8)                                          | 5088.3(5)                                                                          |
| Density (g/cm <sup>3</sup> ) | 1.522                                              | 1.536                                              | 1.627                                              | 1.640                                              | 1.637                                                                              |
| R-factor (%)                 | 6.47                                               | 5.2                                                | 3.07                                               | 3.55                                               | 2.66                                                                               |
| CCDC Number                  | 2016007                                            | N/A                                                | 2016008                                            | 2016006                                            | 2016009                                                                            |

a. Platon (Spek, A. L. *Acta Cryst.*, **2009**, D65, 148-155) was used to transform the space group from *P4/nnc* to the suggested *P4/mcc*, which includes an additional mirror through the phthalocyanine ring, and therefore imposes a 50:50 disorder between the two Nd sites. Refinement of the structure in the new space group did not yield any appreciable improvement of the model or R-factors (*P4/nnc*:  $R_1=6.47\%$ ,  $wR_2=18.00\%$ ; *P4/mcc*:  $R_1=5.78\%$ ,  $wR_2=22.55\%$ ). Given that the Nd disorder refines away from a 50:50 ratio in the *P4/nnc* space group, and that the curvature observed for the phthalocyanine rings (convexity toward the major Nd site) is consistent with the structure of the NdPc<sub>2</sub> molecules in all other phases, *P4/nnc* was determined to be the correct space group. The OMIT command was used to omit reflections affected by the beam stop.

b. Parameters taken from the following reference: Darovskikh, A.N.; Tsytsenko, A.K.; Frank-Kamenetskaya, O.V.; Fundamenskii, V.S.; Moskalev, P.N. Polymorphism of Diphthalocyanine-Neodymium. Molecular and Crystal Structure of the  $\beta$ -Phase. *Sov. Phys. Crystallogr.*, **1984**, *24*, 273-276.

c. The OMIT command was used to omit reflections affected by the beam stop.

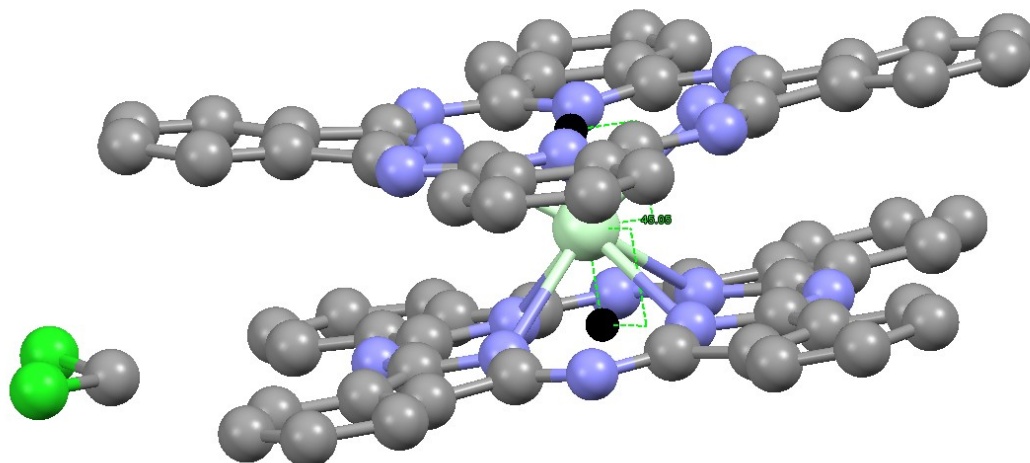

**Figure S6.** An example of how the skew angle is calculated using the  $\text{CH}_2\text{Cl}_2$  solvate phase. Centroids are defined by the four isoindole nitrogens on each Pc ligand (Nd: green, N: blue, C: grey, Cl: bright green). Hydrogens are omitted for clarity.

**Table S4.** Geometric parameters of the different  $\text{NdPc}_2$  polymorphs.

|                                                         | $\alpha$ -Phase | $\beta$ -Phase | $\gamma$ -Phase | $\delta$ -Phase | $\text{CH}_2\text{Cl}_2$ Solvate Phase |
|---------------------------------------------------------|-----------------|----------------|-----------------|-----------------|----------------------------------------|
| Skew angle ( $^\circ$ )                                 | 40.9            | 39.0           | 40.8            | 42.7            | 45                                     |
| Shortest Nd-Nd Distance ( $\text{\AA}$ )                | 6.4202(16)      | 8.458          | 8.852(2)        | 7.0782(6)       | 7.8897(4)                              |
| Slip angle ( $^\circ$ )                                 | 90              | 49.5           | 47.3            | 67              | 55.3                                   |
| Vertical intermolecular Pc-Pc Distance ( $\text{\AA}$ ) | 3.45            | 3.45           | 3.57            | 3.57            | 3.54                                   |

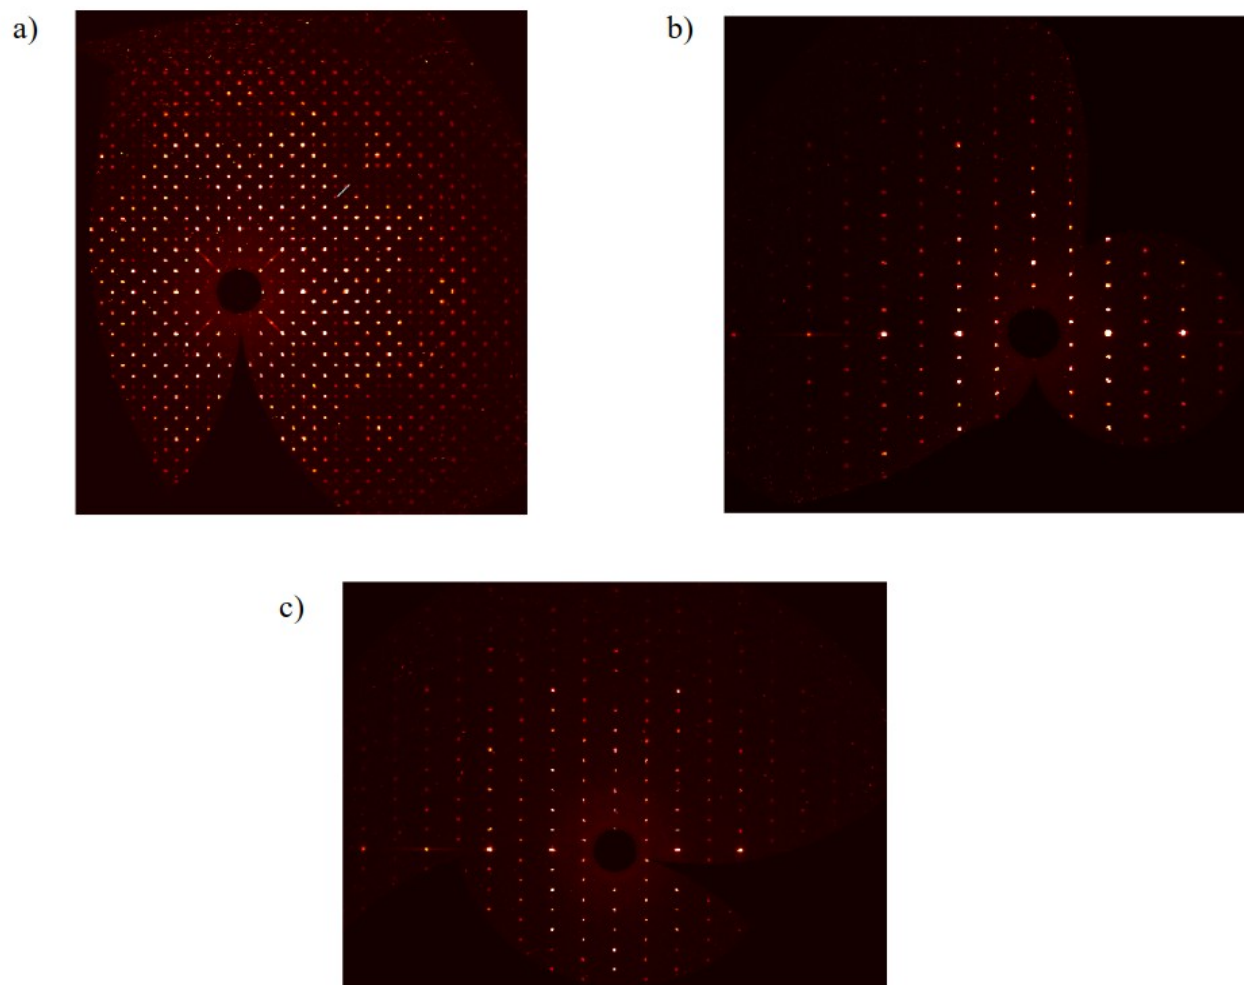

**Figure S7.** Reflection data for the NdPc<sub>2</sub> α-phase showing the lack of a supercell or superperiod in the directions a) 0kl b) h0l c) hk0.



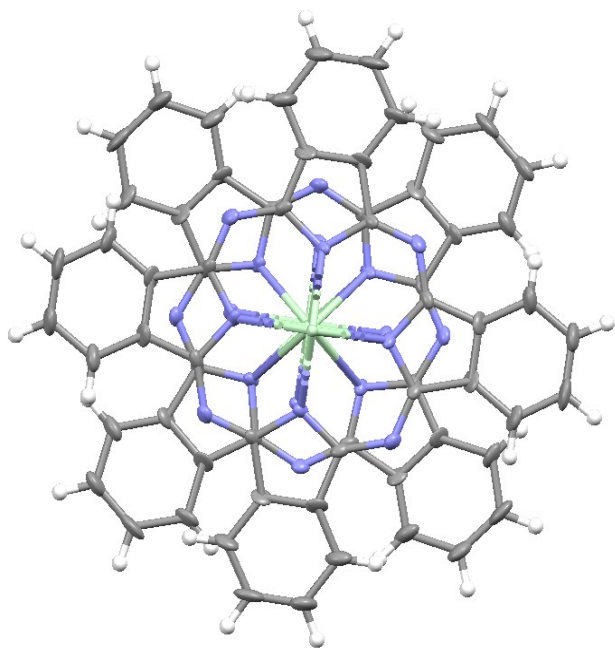

**Figure S8.** Thermal ellipsoid plot for the NdPc<sub>2</sub>  $\alpha$ -phase. Ellipsoids shown at 50% probability (Nd: green, C: grey, N: blue, H: white).

a)

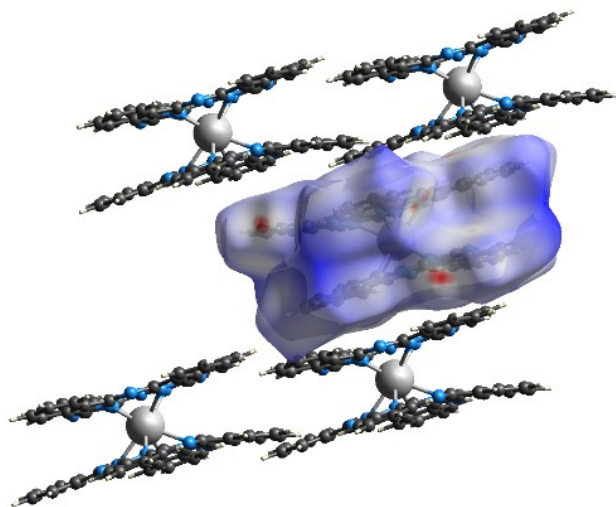

b)

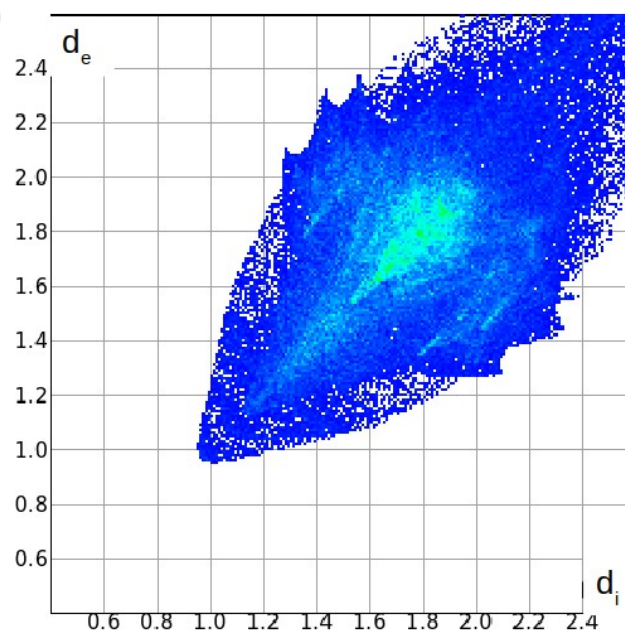

**Figure S9.** Hirshfeld plot (a) and corresponding fingerprint plot (b) for the NdPc<sub>2</sub>  $\beta$ -phase.

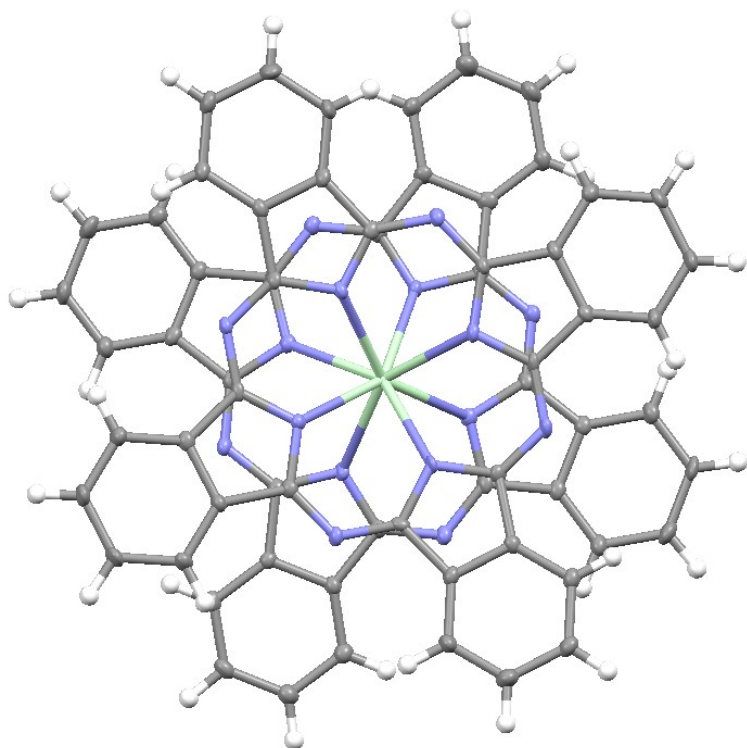

**Figure S10.** Thermal ellipsoid plot for the NdPc<sub>2</sub>  $\gamma$ -phase. Ellipsoids shown at a 50% probability (Nd: green, N: blue, C: grey, H: white).

a)

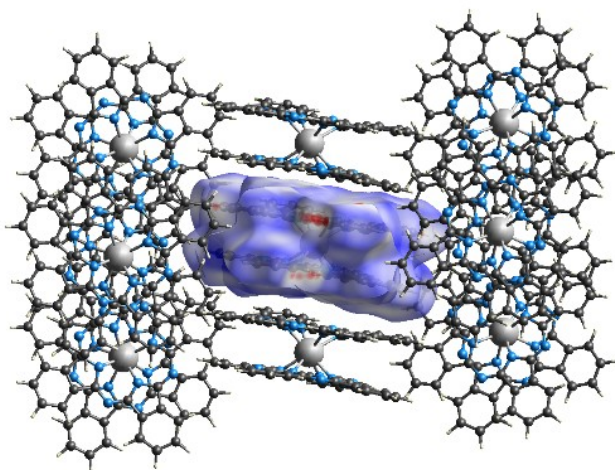

b)

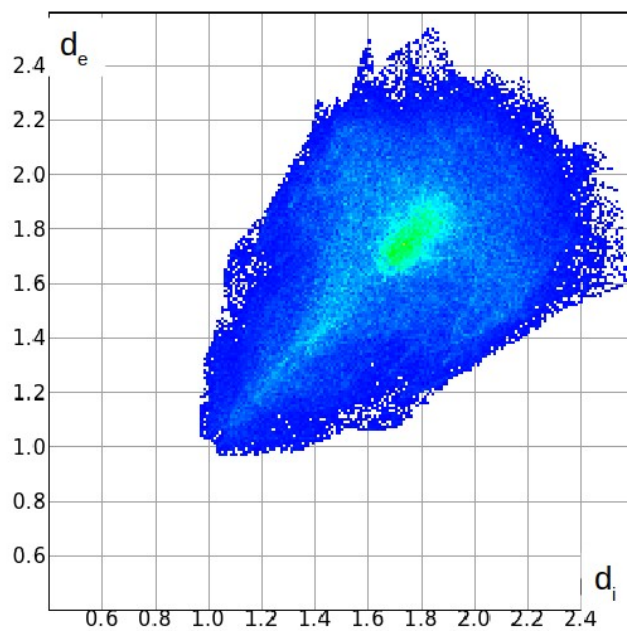

**Figure S11.** The Hirshfeld surface (a) and corresponding fingerprint plot (b) for the NdPc<sub>2</sub>  $\gamma$ -phase.

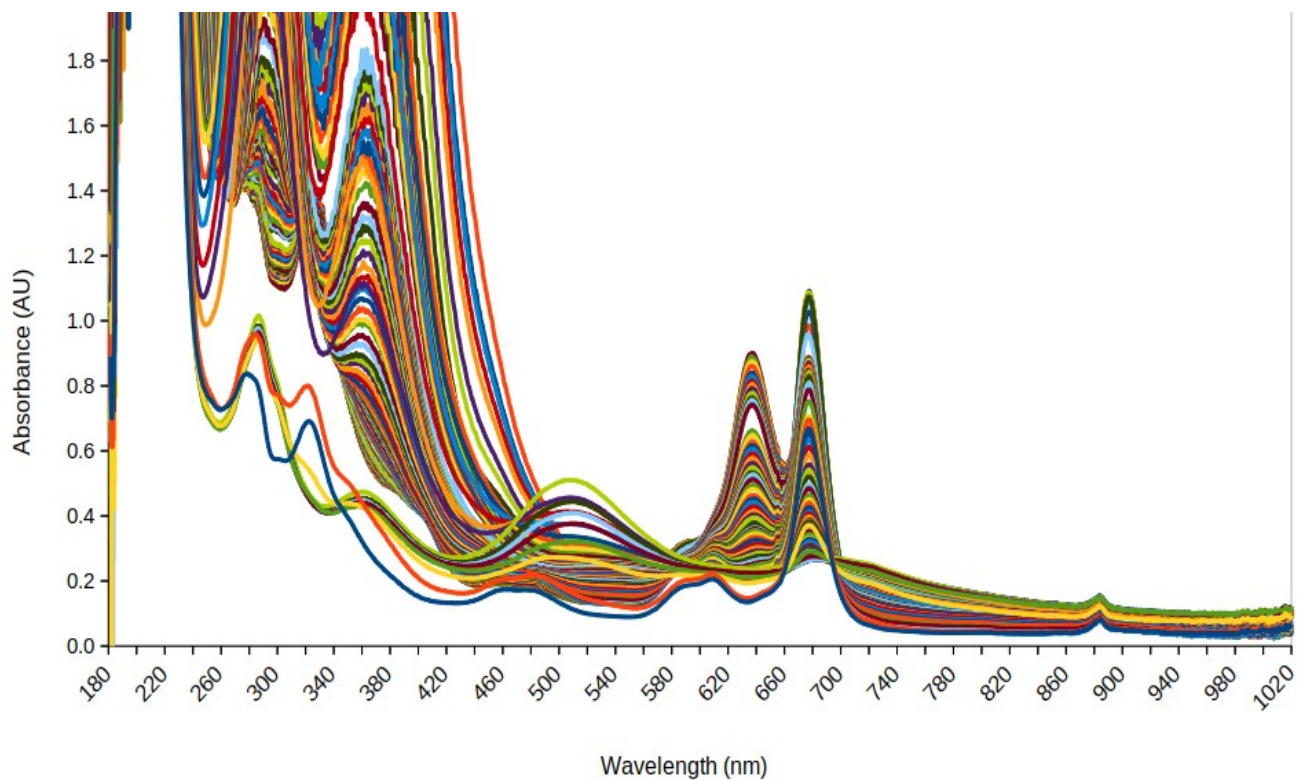

**Figure S12.** Redox titration of NdPc<sub>2</sub>  $\gamma$ -phase crystals, re-dissolved in CH<sub>2</sub>Cl<sub>2</sub>.

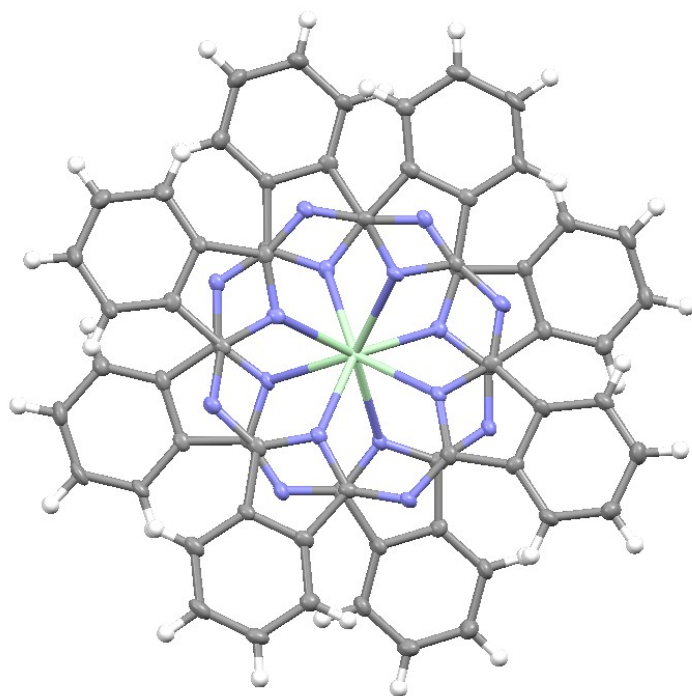

**Figure S13.** Thermal ellipsoid plot for the NdPc<sub>2</sub>  $\delta$ -phase. Ellipsoids shown at a 50% probability (Nd: green, N: blue, C: grey, H: white).

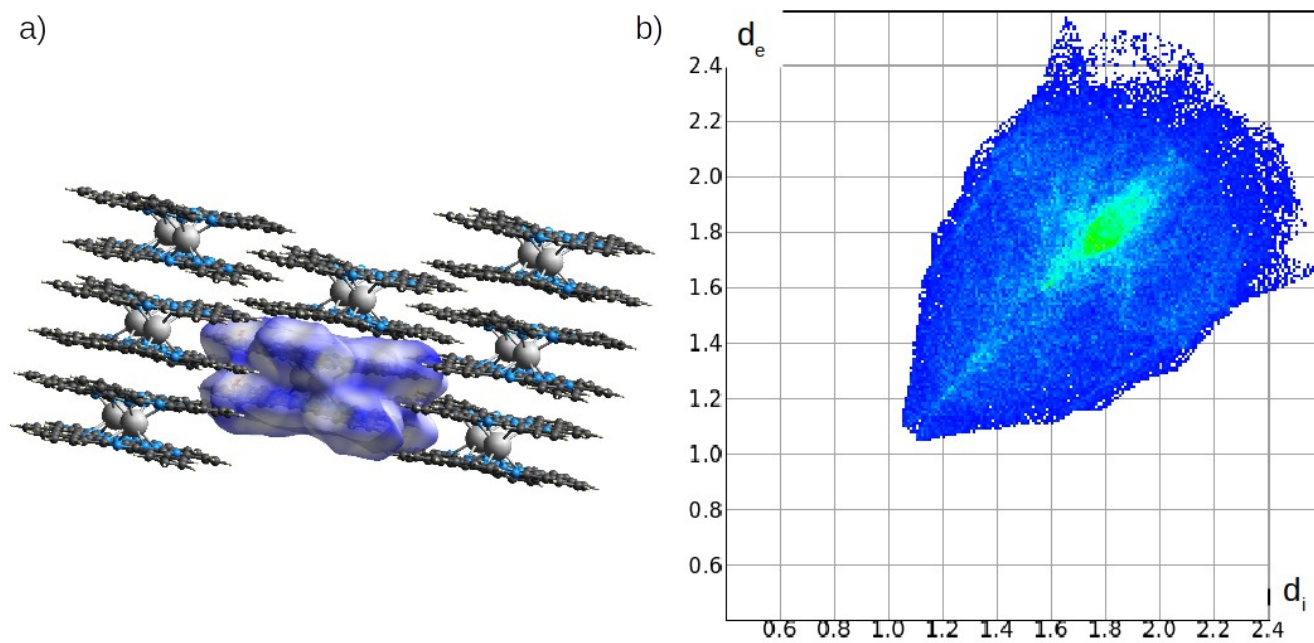

**Figure S14:** The Hirshfeld surface (a) and corresponding fingerprint plot (b) for the NdPc<sub>2</sub>  $\delta$ -phase.

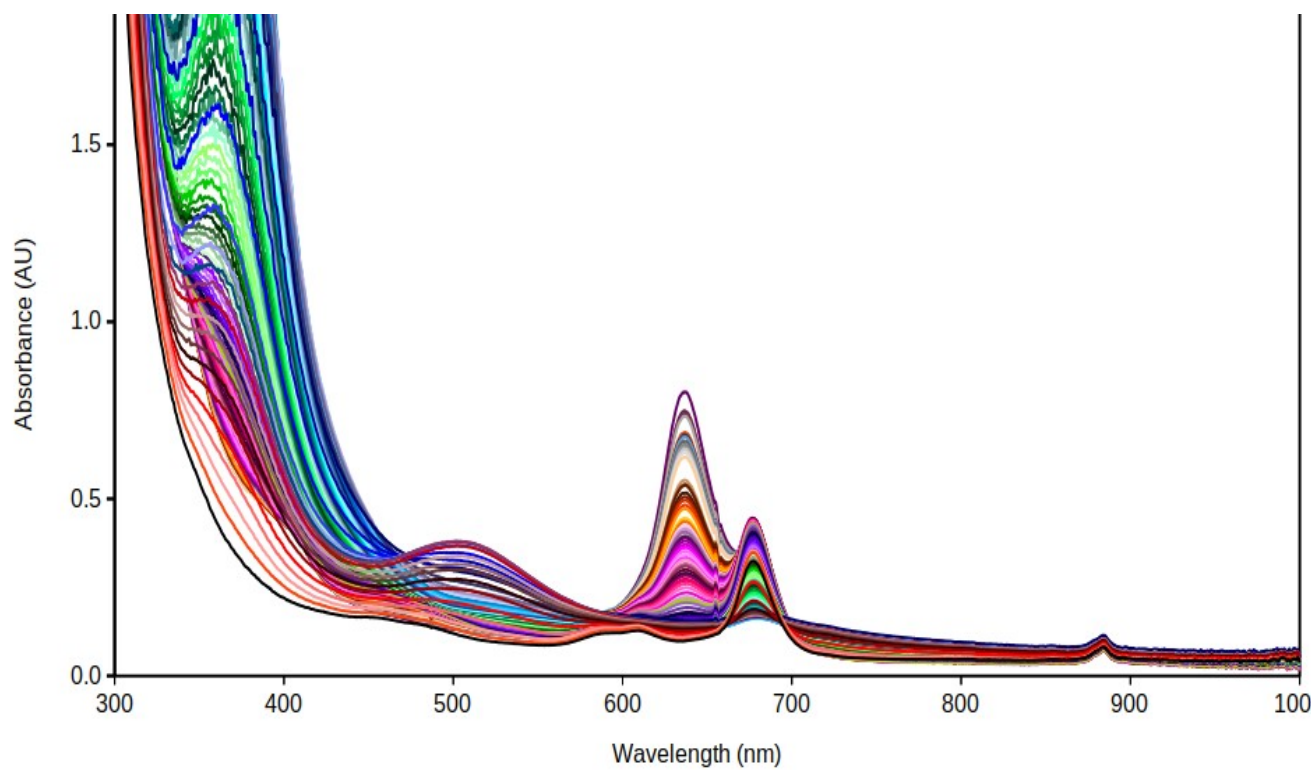

**Figure S15.** Redox titration of NdPc<sub>2</sub>  $\delta$ -phase crystals, re-dissolved in CH<sub>2</sub>Cl<sub>2</sub>.

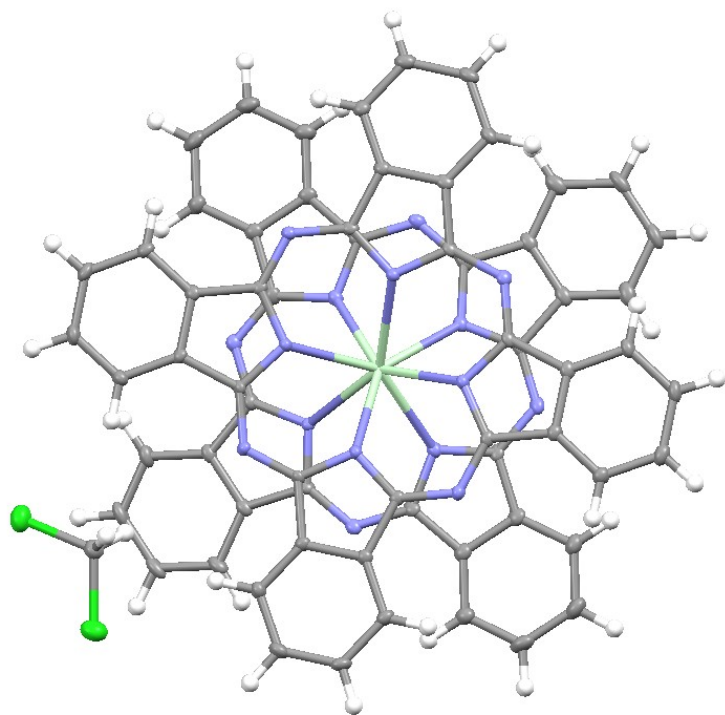

**Figure S16.** Thermal ellipsoid plot for the  $\text{NdPc}_2 \cdot \text{CH}_2\text{Cl}_2$  solvate phase. Ellipsoids shown at a 50% probability (Nd: green, N: blue, C: grey, H: white).

a)

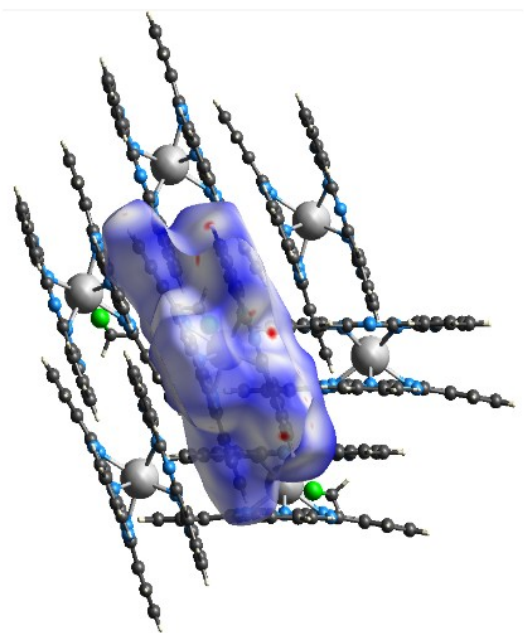

b)

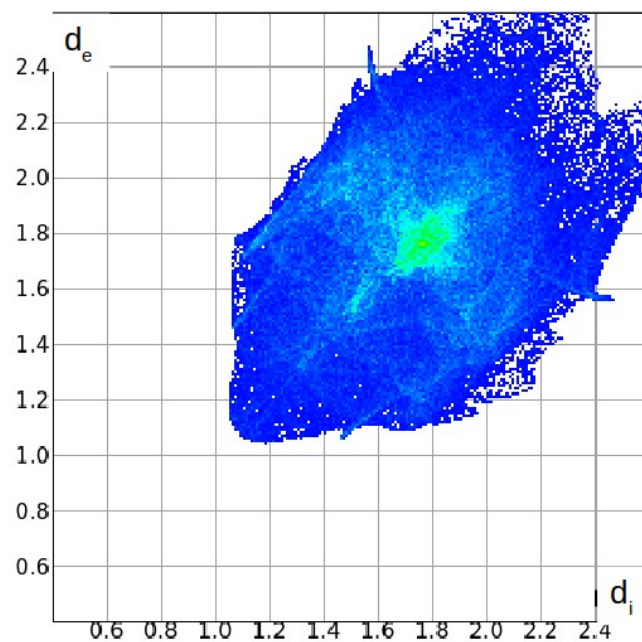

**Figure S17.** The Hirshfeld surface (a) and corresponding fingerprint plot (b) for the  $\text{NdPc}_2 \cdot \text{CH}_2\text{Cl}_2$  solvate phase.

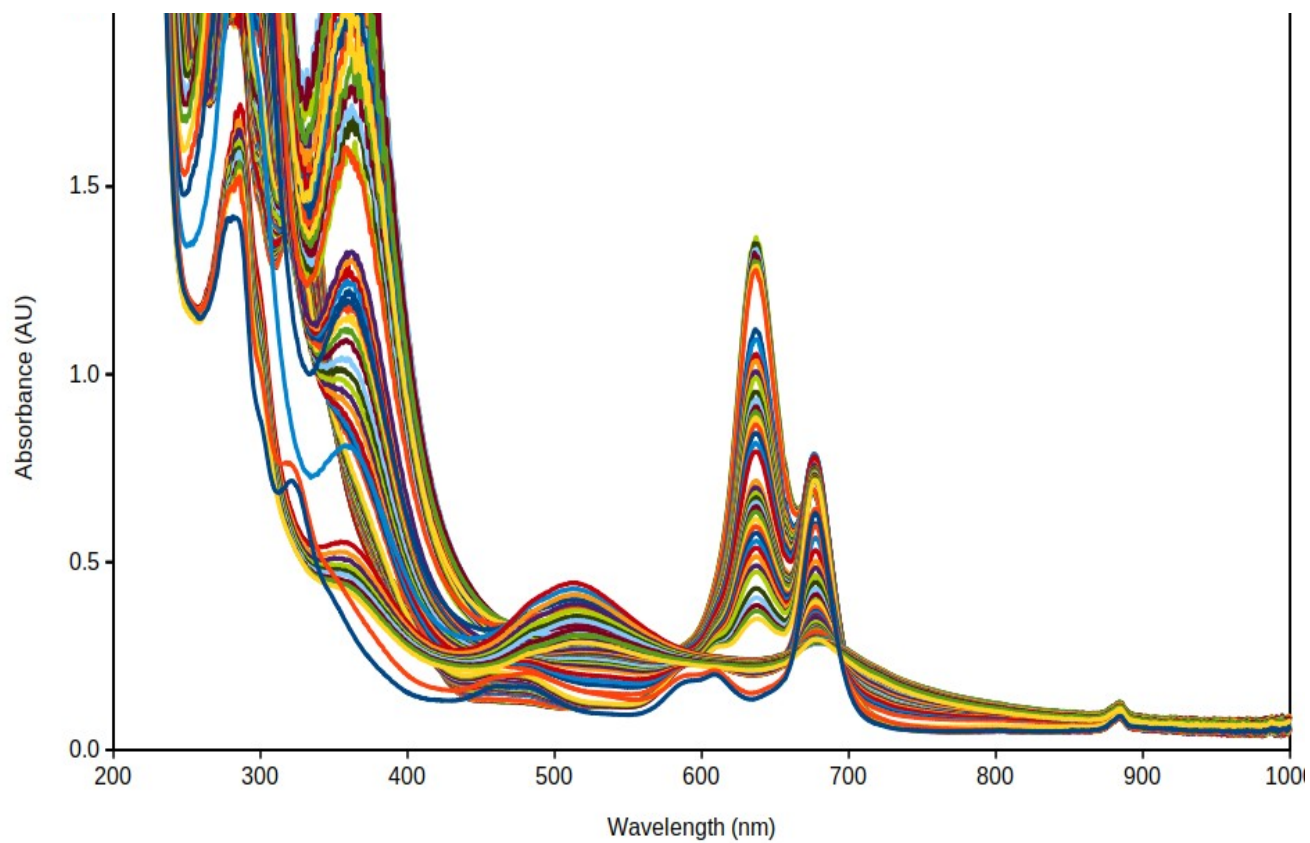

**Figure S18.** Redox titration of NdPc<sub>2</sub>·CH<sub>2</sub>Cl<sub>2</sub> solvate phase crystals, re-dissolved in CH<sub>2</sub>Cl<sub>2</sub>.

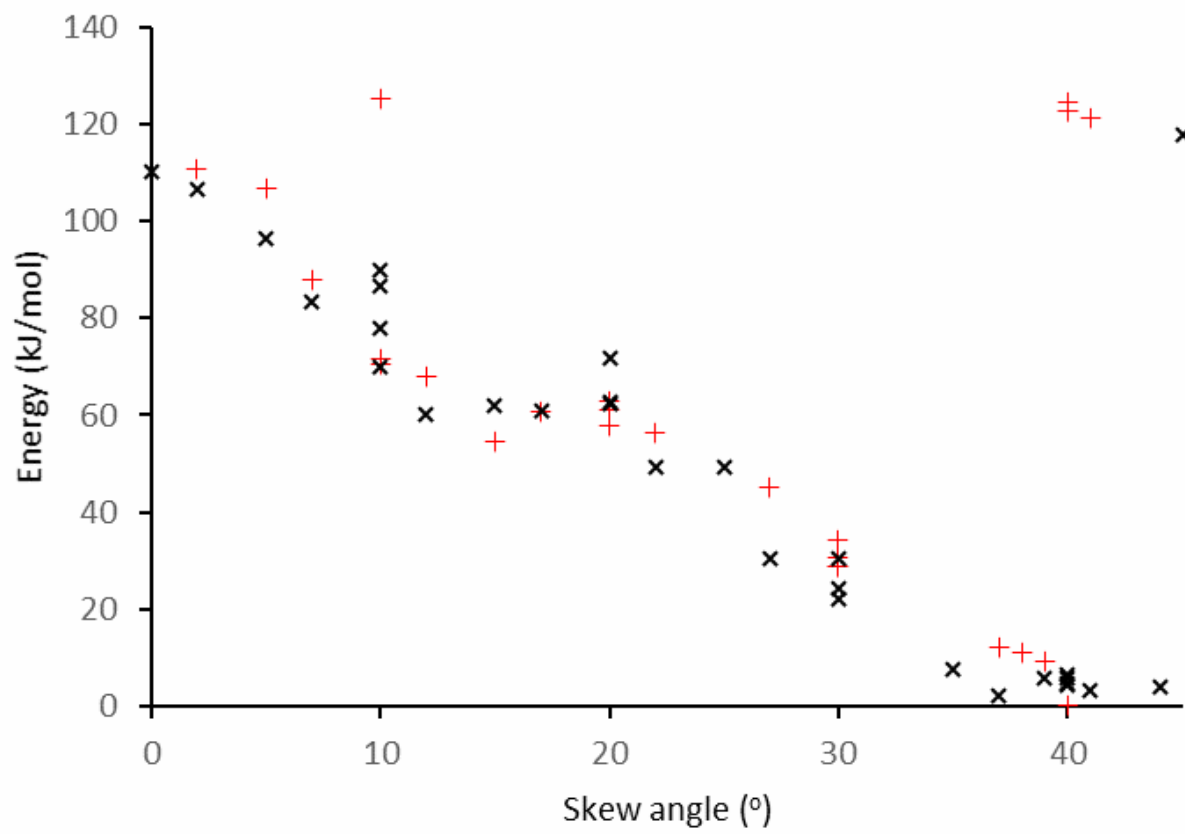

**Figure S19.** Influence of the skew angle of a NdPc<sub>2</sub> molecule on the energies of its quintet (ferromagnetic coupling between the Nd<sup>3+</sup> center and the phthalocyanine radical, ×) and triplet states (antiferromagnetic coupling, +).

**Table S5.** Crystallographic Parameters for the SmPc<sub>2</sub> Polymorphs

|                              | $\gamma$ -Phase                                       | $\delta$ -Phase                                    | CH <sub>2</sub> Cl <sub>2</sub> Solvate Phase                                      |
|------------------------------|-------------------------------------------------------|----------------------------------------------------|------------------------------------------------------------------------------------|
| Chemical Formula             | C <sub>64</sub> H <sub>32</sub> N <sub>16</sub> Sm    | C <sub>64</sub> H <sub>32</sub> N <sub>16</sub> Sm | C <sub>64</sub> H <sub>32</sub> N <sub>16</sub> Sm·CH <sub>2</sub> Cl <sub>2</sub> |
| Crystal System               | Orthorhombic                                          | Monoclinic                                         | Orthorhombic                                                                       |
| Z                            | 4                                                     | 4                                                  | 4                                                                                  |
| Space Group                  | <i>P</i> 2 <sub>1</sub> 2 <sub>1</sub> 2 <sub>1</sub> | <i>C</i> 2/ <i>c</i>                               | <i>Pnma</i>                                                                        |
| a (Å)                        | 8.8201(2)                                             | 28.1112(14)                                        | 28.1354(6)                                                                         |
| b (Å)                        | 10.6092(3)                                            | 14.2031(12)                                        | 22.9450(6)                                                                         |
| c (Å)                        | 50.7567(11)                                           | 13.1654(5)                                         | 7.8933(2)                                                                          |
| $\alpha$ (°)                 | 90.0                                                  | 90.0                                               | 90.0                                                                               |
| $\beta$ (°)                  | 90.0                                                  | 115.574(2)                                         | 90.0                                                                               |
| $\gamma$ (°)                 | 90.0                                                  | 90.0                                               | 90.0                                                                               |
| V (Å <sup>3</sup> )          | 4749.52                                               | 4741.51                                            | 5095.65                                                                            |
| Density (g/cm <sup>3</sup> ) | 1.644                                                 | 1.647                                              | 1.643                                                                              |
| R-factor (%)                 | 3.8                                                   | 1.73                                               | 3.1                                                                                |
| CCDC Number                  | 2096866                                               | 2096862                                            | 2096863                                                                            |

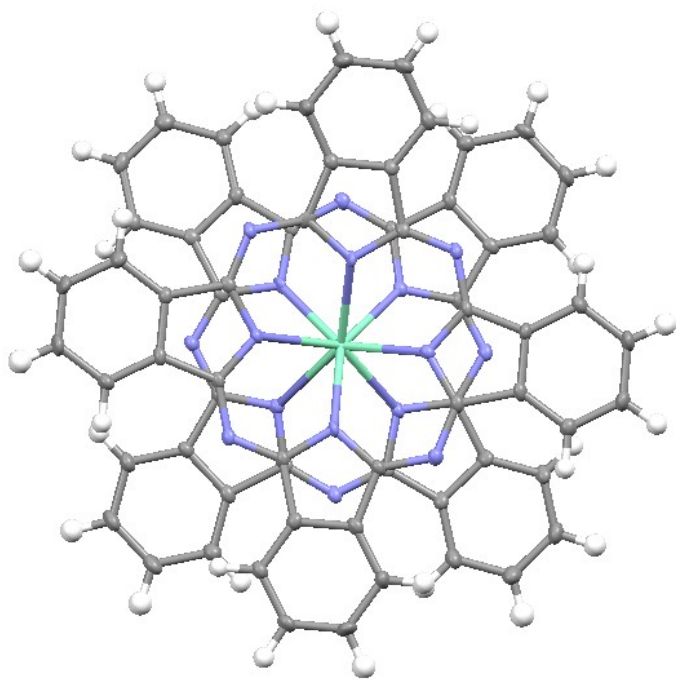**Figure S20.** Thermal ellipsoid plot for the SmPc<sub>2</sub>  $\gamma$ -phase. Ellipsoids shown at 50% probability (Sm: teal, C: grey, N: blue, H: white).



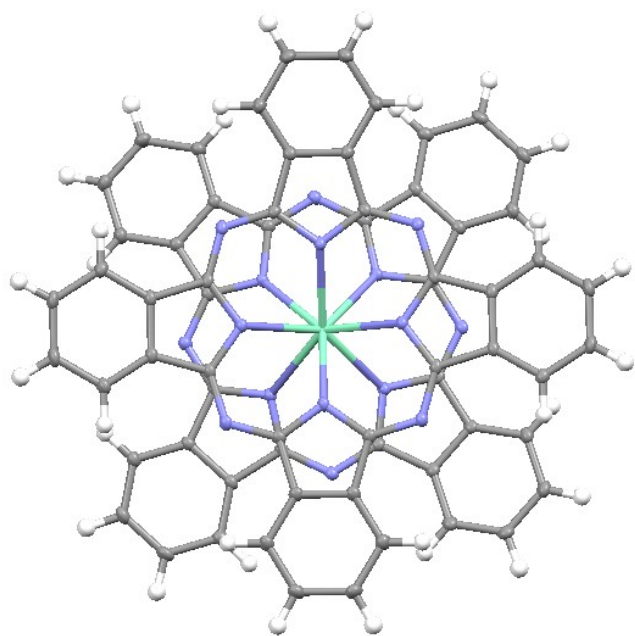

**Figure S21.** Thermal ellipsoid plot for the SmPc<sub>2</sub> δ-phase. Ellipsoids shown at 50% probability (Sm: teal, C: grey, N: blue, H: white).

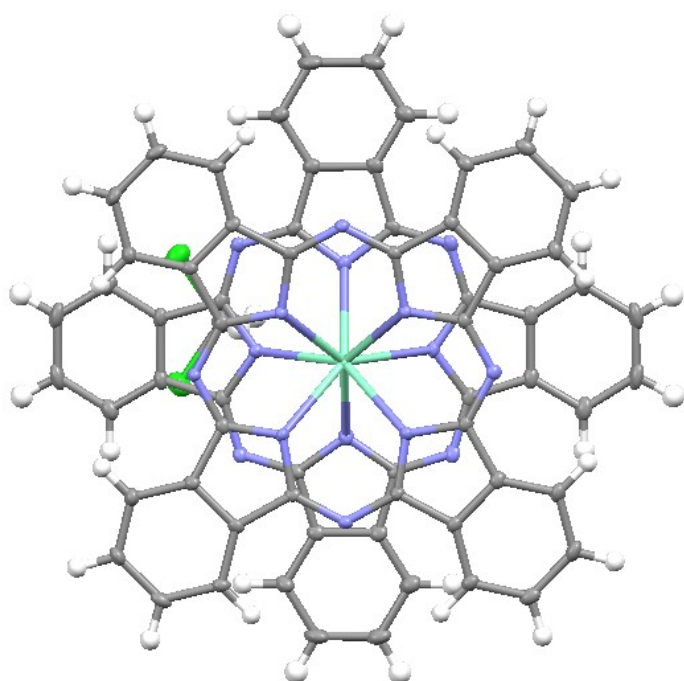

**Figure S22.** Thermal ellipsoid plot for the SmPc<sub>2</sub>·CH<sub>2</sub>Cl<sub>2</sub> phase. Ellipsoids shown at 50% probability (Sm: teal, C: grey, N: blue, H: white).

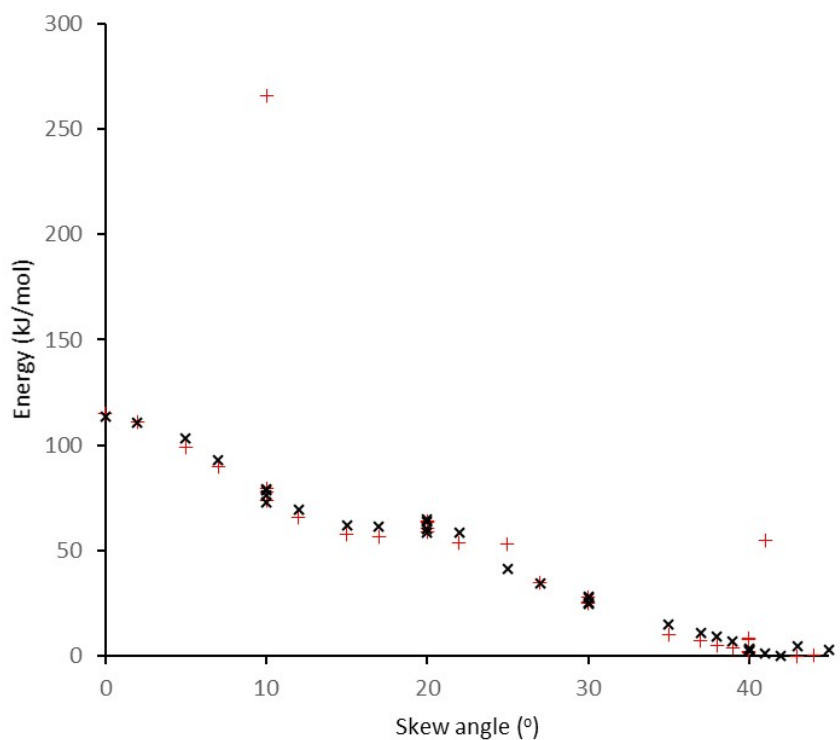

**Figure S23.** Influence of the skew angle of a SmPc<sub>2</sub> molecule on the energies of its septet (ferromagnetic coupling between the Sm<sup>3+</sup> center and the phthalocyanine radical, ×) and quintet states (antiferromagnetic coupling, +).

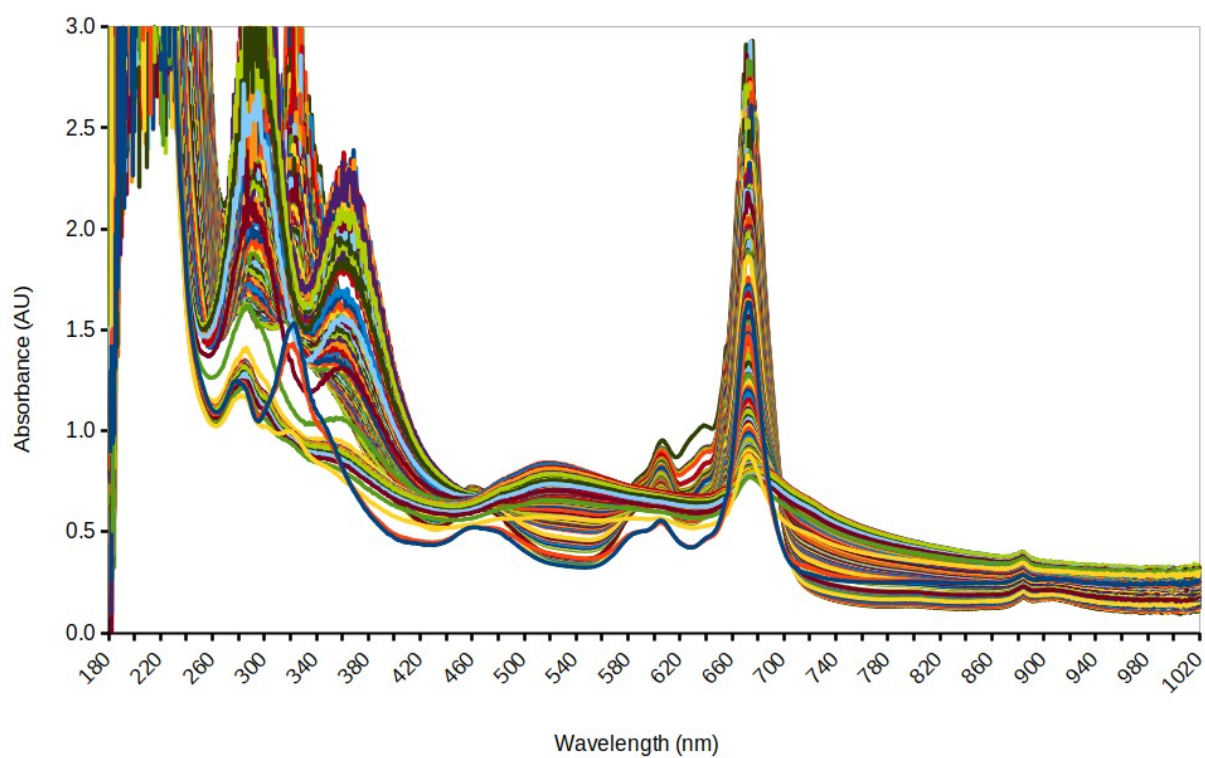

**Figure S24.** Redox titration of SmPc<sub>2</sub>·CH<sub>2</sub>Cl<sub>2</sub> solvate phase crystals, re-dissolved in CH<sub>2</sub>Cl<sub>2</sub>.

**Table S6.** Crystallographic Parameters for GdPc<sub>2</sub> Polymorphs

|                              | $\gamma$ -Phase <sup>a</sup>                       | $\delta$ -Phase                                    | CH <sub>2</sub> Cl <sub>2</sub> Solvate Phase                                      |
|------------------------------|----------------------------------------------------|----------------------------------------------------|------------------------------------------------------------------------------------|
| Chemical Formula             | C <sub>64</sub> H <sub>32</sub> N <sub>16</sub> Gd | C <sub>64</sub> H <sub>32</sub> N <sub>16</sub> Gd | C <sub>64</sub> H <sub>32</sub> N <sub>16</sub> Gd·CH <sub>2</sub> Cl <sub>2</sub> |
| Crystal System               | Orthorhombic                                       | Monoclinic                                         | Orthorhombic                                                                       |
| Z                            | 4                                                  | 4                                                  | 4                                                                                  |
| Space Group                  | <i>P2<sub>1</sub>2<sub>1</sub>2<sub>1</sub></i>    | <i>C2/c</i>                                        | <i>Pnma</i>                                                                        |
| a (Å)                        | 8.8412(14)                                         | 28.125(3)                                          | 28.356(3)                                                                          |
| b (Å)                        | 10.5892(15)                                        | 14.1663(14)                                        | 22.882(3)                                                                          |
| c (Å)                        | 50.762(8)                                          | 13.1416(14)                                        | 8.0460(10)                                                                         |
| $\alpha$ (°)                 | 90.0                                               | 90.0                                               | 90.0                                                                               |
| $\beta$ (°)                  | 90.0                                               | 115.688(4)                                         | 90.0                                                                               |
| $\gamma$ (°)                 | 90.0                                               | 90.0                                               | 90.0                                                                               |
| V (Å <sup>3</sup> )          | 4752.4                                             | 4718.49                                            | 5220.58                                                                            |
| Density (g/cm <sup>3</sup> ) | 1.653                                              | 1.664                                              | 1.612                                                                              |
| R-factor (%)                 | 5.38                                               | 5.12                                               | 4.45                                                                               |
| CCDC Number                  | 2096860                                            | 2096855                                            | 2096853                                                                            |

<sup>a</sup>The  $\gamma$ -phase crystals are often twinned, resulting in residual electron density along the Gd-Gd directions.

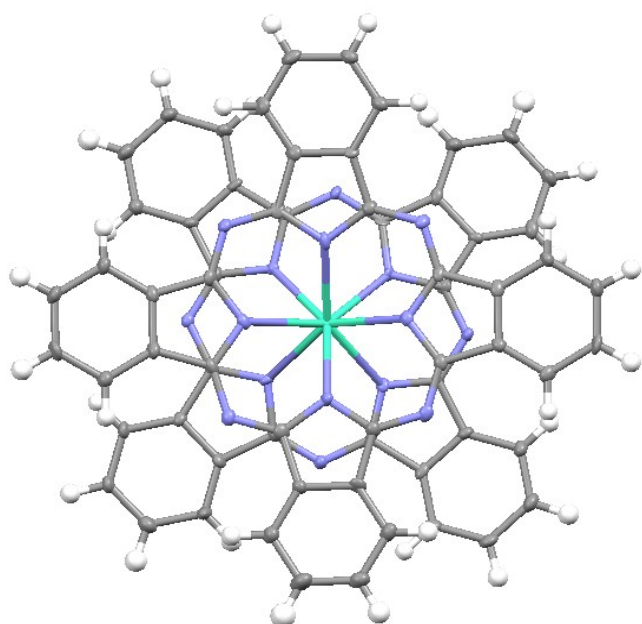

**Figure S25.** Thermal ellipsoid plot for the GdPc<sub>2</sub>  $\gamma$ -phase. Ellipsoids shown at 50% probability (Gd: blue-green, C: grey, N: blue, H: white).

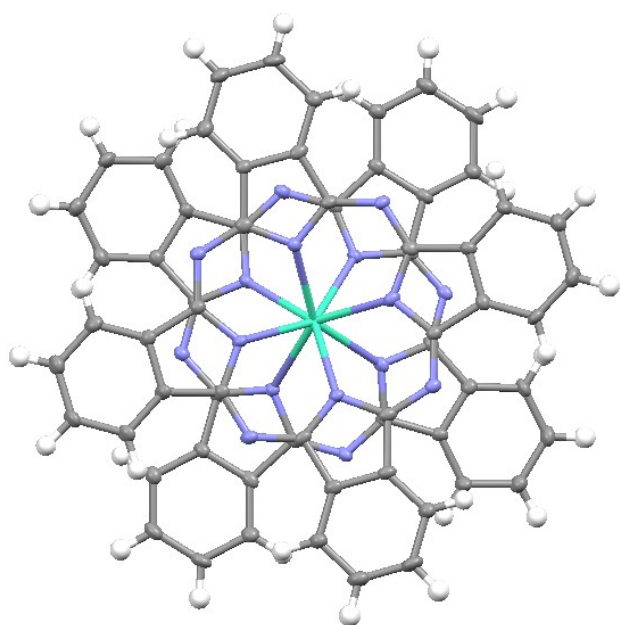

**Figure S26.** Thermal ellipsoid plot for the GdPc<sub>2</sub>  $\delta$ -phase. Ellipsoids shown at 50% probability (Gd: blue-green, C: grey, N: blue, H: white).

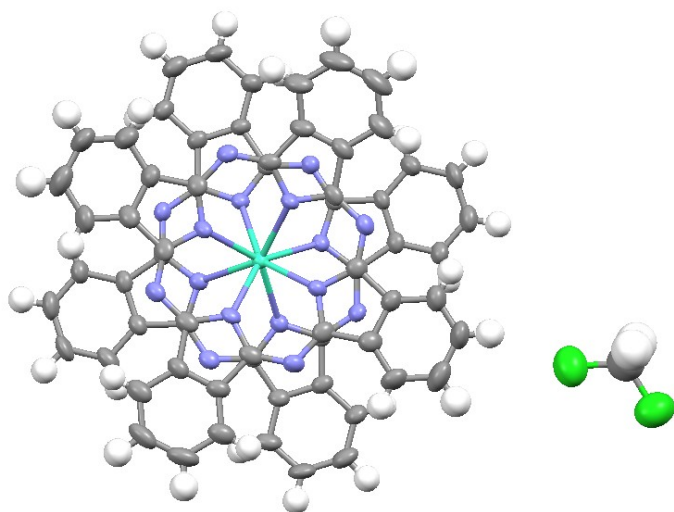

**Figure S27.** Thermal ellipsoid plot for the GdPc<sub>2</sub>·CH<sub>2</sub>Cl<sub>2</sub> phase. Ellipsoids shown at 50% probability (Gd: blue-green, C: grey, N: blue, Cl: bright green, H: white).

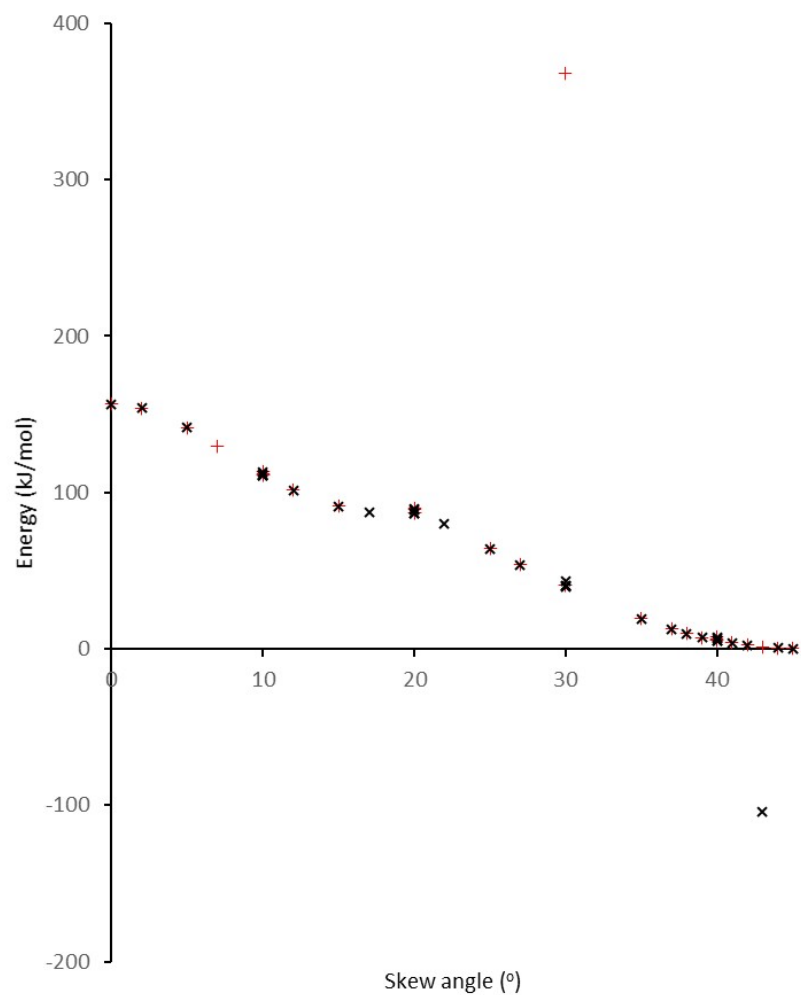

**Figure S28.** Influence of the skew angle of a GdPc<sub>2</sub> molecule on the energies of its nonet (ferromagnetic coupling between the Gd<sup>3+</sup> center and the phthalocyanine radical, ×) and septet states (antiferromagnetic coupling, +).

**Table S7.** Crystallographic Parameters for TbPc<sub>2</sub> Polymorphs

|                              | $\gamma$ -Phase <sup>a</sup>                          | $\delta$ -Phase                                    | CH <sub>2</sub> Cl <sub>2</sub> Solvate Phase                                      |
|------------------------------|-------------------------------------------------------|----------------------------------------------------|------------------------------------------------------------------------------------|
| Chemical Formula             | C <sub>64</sub> H <sub>32</sub> N <sub>16</sub> Tb    | C <sub>64</sub> H <sub>32</sub> N <sub>16</sub> Tb | C <sub>64</sub> H <sub>32</sub> N <sub>16</sub> Tb·CH <sub>2</sub> Cl <sub>2</sub> |
| Crystal System               | Orthorhombic                                          | Monoclinic                                         | Orthorhombic                                                                       |
| Z                            | 4                                                     | 4                                                  | 4                                                                                  |
| Space Group                  | <i>P</i> 2 <sub>1</sub> 2 <sub>1</sub> 2 <sub>1</sub> | <i>C</i> 2/ <i>c</i>                               | <i>P</i> <i>n</i> <i>m</i> <i>a</i>                                                |
| a (Å)                        | 8.8136(6)                                             | 28.086(3)                                          | 28.0516(7)                                                                         |
| b (Å)                        | 10.5756(7)                                            | 14.160(2)                                          | 22.9642(8)                                                                         |
| c (Å)                        | 50.713(3)                                             | 13.1416(14)                                        | 7.8827(2)                                                                          |
| $\alpha$ (°)                 | 90.0                                                  | 90.0                                               | 90.0                                                                               |
| $\beta$ (°)                  | 90.0                                                  | 115.708(10)                                        | 90.0                                                                               |
| $\gamma$ (°)                 | 90.0                                                  | 90.0                                               | 90.0                                                                               |
| V (Å <sup>3</sup> )          | 4726.91                                               | 4709.06                                            | 5077.9                                                                             |
| Density (g/cm <sup>3</sup> ) | 1.664                                                 | 1.670                                              | 1.660                                                                              |
| R-factor (%)                 | 5.01                                                  | 4.62                                               | 2.39                                                                               |
| CCDC Number                  | 2108638                                               | 2096861                                            | 2096864                                                                            |

<sup>a</sup>The  $\gamma$ -phase crystals are often twinned, resulting in residual electron density along the Tb-Tb directions.

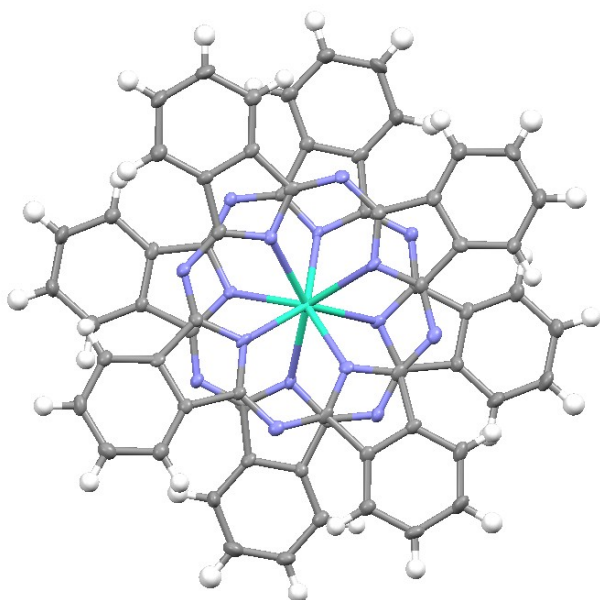

**Figure S29.** Thermal ellipsoid plot for the TbPc<sub>2</sub>  $\gamma$ -phase. Ellipsoids shown at 50% probability (Tb: blue-green, C: grey, N: blue, H: white).

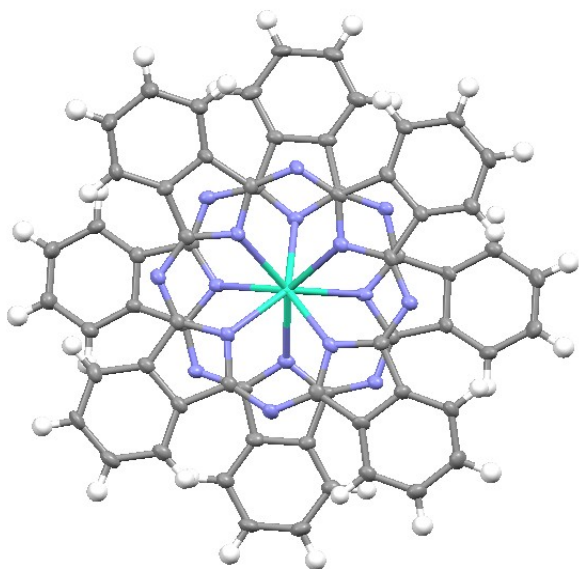

**Figure S30.** Thermal ellipsoid plot for the TbPc<sub>2</sub> δ-phase. Ellipsoids shown at 50% probability (Tb: blue-green, C: grey, N: blue, H: white).

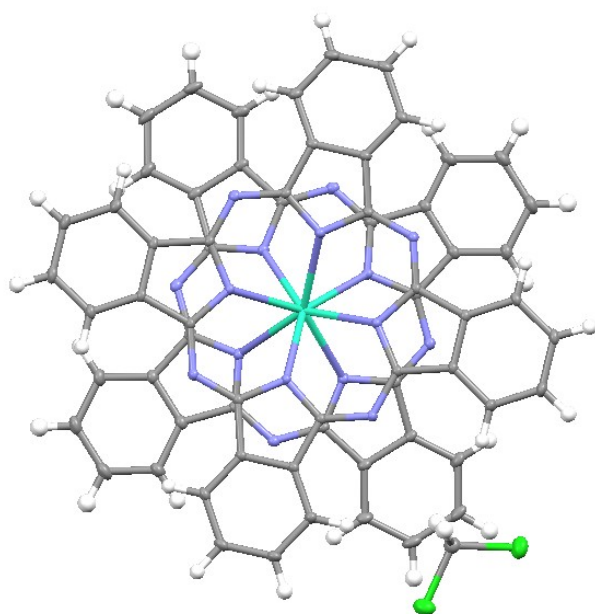

**Figure S31.** Thermal ellipsoid plot for the TbPc<sub>2</sub>·CH<sub>2</sub>Cl<sub>2</sub> phase. Ellipsoids shown at 50% probability (Tb: blue-green, C: grey, N: blue, Cl: bright green, H: white).

**Table S8.** Crystallographic Parameters for DyPc<sub>2</sub> Polymorphs

|                              | $\alpha$ -Phase <sup>a</sup>                       | $\gamma$ -Phase                                    | CH <sub>2</sub> Cl <sub>2</sub> Solvate Phase                                     |
|------------------------------|----------------------------------------------------|----------------------------------------------------|-----------------------------------------------------------------------------------|
| Chemical Formula             | C <sub>64</sub> H <sub>32</sub> N <sub>16</sub> Dy | C <sub>64</sub> H <sub>32</sub> N <sub>16</sub> Dy | C <sub>64</sub> H <sub>32</sub> N <sub>6</sub> Dy·CH <sub>2</sub> Cl <sub>2</sub> |
| Crystal System               | Tetragonal                                         | Orthorhombic                                       | Orthorhombic                                                                      |
| Z                            | 2                                                  | 4                                                  | 4                                                                                 |
| Space Group                  | <i>P4/nnc</i>                                      | <i>P2<sub>1</sub>2<sub>1</sub>2<sub>1</sub></i>    | <i>Pnma</i>                                                                       |
| a (Å)                        | 19.548(4)                                          | 8.8171(11)                                         | 28.030(3)                                                                         |
| b (Å)                        | 19.548(4)                                          | 10.5671(12)                                        | 22.902(3)                                                                         |
| c (Å)                        | 6.477(2)                                           | 50.658(6)                                          | 7.8972(8)                                                                         |
| $\alpha$ (°)                 | 90.0                                               | 90.0                                               | 90.0                                                                              |
| $\beta$ (°)                  | 90.0                                               | 90.0                                               | 90.0                                                                              |
| $\gamma$ (°)                 | 90.0                                               | 90.0                                               | 90.0                                                                              |
| V (Å <sup>3</sup> )          | 2475.02                                            | 4718.93                                            | 5069.55                                                                           |
| Density (g/cm <sup>3</sup> ) | 1.584                                              | 1.672                                              | 1.667                                                                             |
| R-factor (%)                 | 7.00                                               | 4.57                                               | 5.87                                                                              |
| CCDC Number                  | 2096850                                            | 2096851                                            | 2096852                                                                           |

<sup>a</sup> There is a small residual electronic density peak at coordinates ( $\frac{1}{4}$ ,  $\frac{1}{4}$ ,  $\frac{3}{4}$ ), mirroring the Dy center with respect to the phthalocyanine ring. This suggests some Dy disorder between two positions shifted along the DyPc<sub>2</sub> stack by the Pc-Pc distance, as was observed in the neodymium case. Attempts to refine this model, however, converged to occupancy factors of less than 1% for the additional Dy site with no significant improvement of the R-factors, and where thus abandoned.

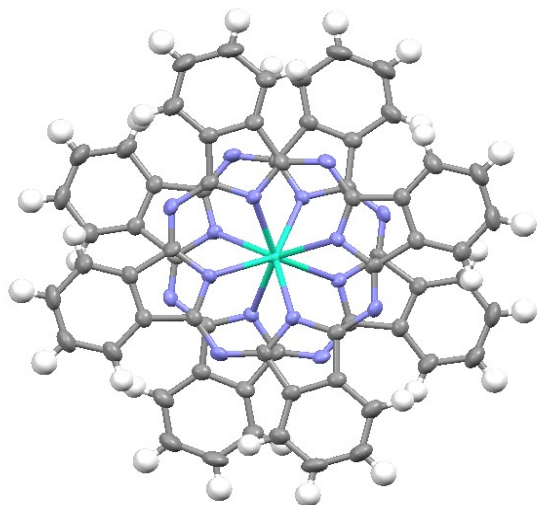

**Figure S32.** Thermal ellipsoid plot for the DyPc<sub>2</sub>  $\alpha$ -phase. Ellipsoids shown at 50% probability (Dy: blue-green, C: grey, N: blue, H: white).



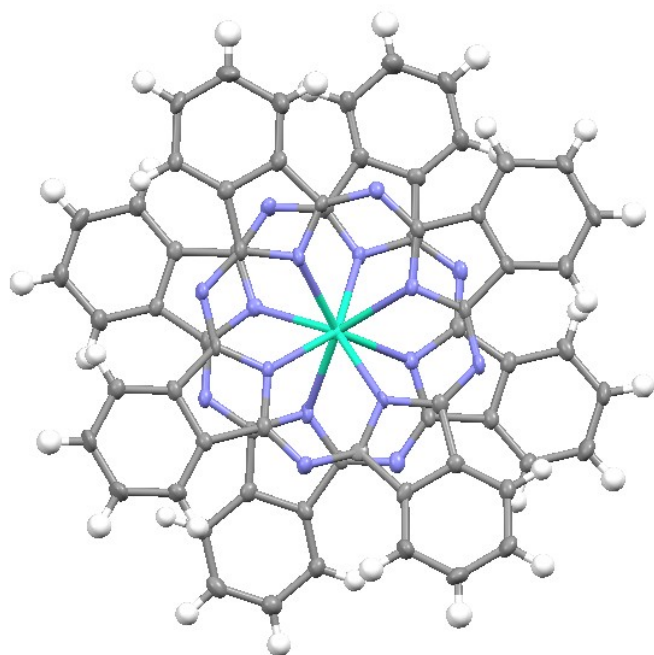

**Figure S33.** Thermal ellipsoid plot for the DyPc<sub>2</sub> γ-phase. Ellipsoids shown at 50% probability (Dy: blue-green, C: grey, N: blue, H: white).

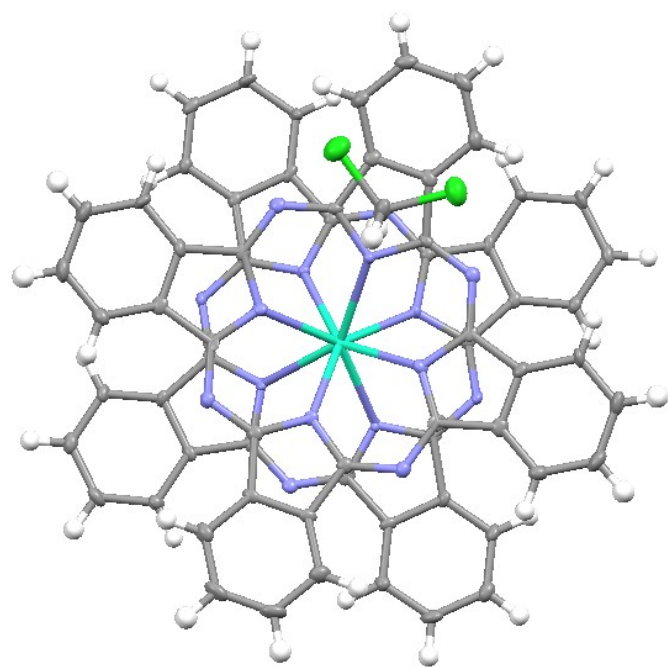

**Figure S34.** Thermal ellipsoid plot for the DyPc<sub>2</sub>·CH<sub>2</sub>Cl<sub>2</sub> phase. Ellipsoids shown at 50% probability (Dy: blue-green, C: grey, N: blue, Cl: bright green, H: white).

**Table S9.** Crystallographic Parameters for ErPc<sub>2</sub>

|                              | CH <sub>2</sub> Cl <sub>2</sub> ·Phase                                             |
|------------------------------|------------------------------------------------------------------------------------|
| Chemical Formula             | C <sub>64</sub> H <sub>32</sub> N <sub>16</sub> Er·CH <sub>2</sub> Cl <sub>2</sub> |
| Crystal System               | Orthorhombic                                                                       |
| Z                            | 4                                                                                  |
| Space Group                  | <i>Pnma</i>                                                                        |
| a (Å)                        | 28.016(3)                                                                          |
| b (Å)                        | 22.942(3)                                                                          |
| c (Å)                        | 7.8678(7)                                                                          |
| α (°)                        | 90.0                                                                               |
| β (°)                        | 90.0                                                                               |
| γ (°)                        | 90.0                                                                               |
| V (Å <sup>3</sup> )          | 5056.97                                                                            |
| Density (g/cm <sup>3</sup> ) | 1.678                                                                              |
| R-factor (%)                 | 4.6                                                                                |
| CCDC Number                  | 2096856                                                                            |

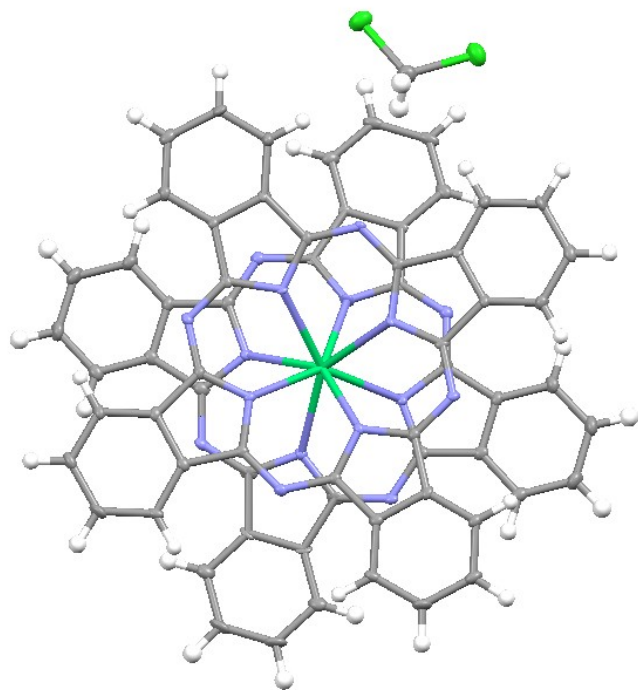

**Figure S35.** Thermal ellipsoid plot for the ErPc<sub>2</sub>·CH<sub>2</sub>Cl<sub>2</sub> phase. Ellipsoids shown at 50% probability (Er: mint green, C: grey, N: blue, Cl: bright green, H: white).

**Table S10.** Crystallographic Parameters for YbPc<sub>2</sub> Polymorphs

|                              | $\gamma$ -Phase                                    | CH <sub>2</sub> Cl <sub>2</sub> Solvate Phase                                      |
|------------------------------|----------------------------------------------------|------------------------------------------------------------------------------------|
| Chemical Formula             | C <sub>64</sub> H <sub>32</sub> N <sub>16</sub> Yb | C <sub>64</sub> H <sub>32</sub> N <sub>16</sub> Yb·CH <sub>2</sub> Cl <sub>2</sub> |
| Crystal System               | Orthorhombic                                       | Orthorhombic                                                                       |
| Z                            | 4                                                  | 4                                                                                  |
| Space Group                  | <i>P2<sub>1</sub>2<sub>1</sub>2<sub>1</sub></i>    | <i>Pnma</i>                                                                        |
| a (Å)                        | 8.7901(6)                                          | 27.955(6)                                                                          |
| b (Å)                        | 10.5965(12)                                        | 22.921(5)                                                                          |
| c (Å)                        | 50.568(4)                                          | 7.8802(12)                                                                         |
| $\alpha$ (°)                 | 90.0                                               | 90.0                                                                               |
| $\beta$ (°)                  | 90.0                                               | 90.0                                                                               |
| $\gamma$ (°)                 | 90.0                                               | 90.0                                                                               |
| V (Å <sup>3</sup> )          | 4710.12                                            | 5049.29                                                                            |
| Density (g/cm <sup>3</sup> ) | 1.690                                              | 1.688                                                                              |
| R-factor (%)                 | 4.1                                                | 4.97                                                                               |
| CCDC Number                  | 2096867                                            | 2096865                                                                            |

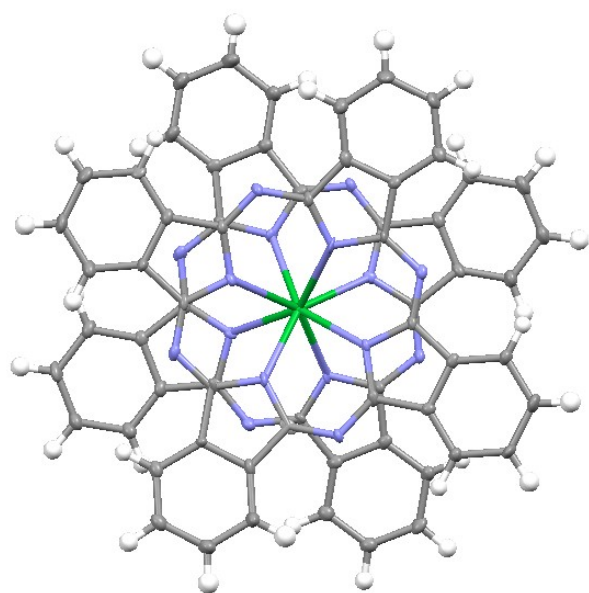**Figure S36.** Thermal ellipsoid plot for the YbPc<sub>2</sub>  $\gamma$ -phase. Ellipsoids shown at 50% probability (Yb: green, C: grey, N: blue, H: white)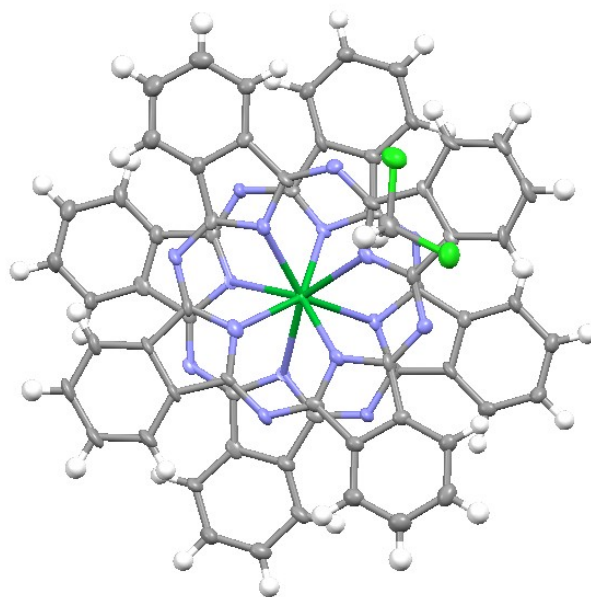**Figure S37.** Thermal ellipsoid plot for the YbPc<sub>2</sub>·CH<sub>2</sub>Cl<sub>2</sub> phase. Ellipsoids shown at 50% probability (La: green, C: grey, N: blue, Cl: bright green, H: white).

**Table S11.** Bond Lengths for  $\alpha$ -LnPc<sub>2</sub>

| LaPc <sub>2</sub> |                 | NdPc <sub>2</sub> |                 | DyPc <sub>2</sub> |                 |
|-------------------|-----------------|-------------------|-----------------|-------------------|-----------------|
| Atom 1 – Atom 2   | Bond Length (Å) | Atom 1 – Atom 2   | Bond Length (Å) | Atom 1 – Atom 2   | Bond Length (Å) |
| La(1) - N(2)      | 2.421           | Nd(1) – N(2)      | 2.467           | Dy(1) - N(2)      | 2.408           |
| C(1) - C(2)       | 1.471(1)        | Nd(2) – N(2)      | 2.615           | C(1) - C(2)       | 1.48(1)         |
| C(1) - N(1)       | 1.32(1)         | C(1) - C(4)       | 1.46(1)         | C(1) - N(1)       | 1.31(1)         |
| C(1) - N(2)       | 1.37(1)         | C(1) - N(1)       | 1.33(1)         | C(1) - N(2)       | 1.371(9)        |
| C(2) - C(3)       | 1.371(1)        | C(1) - N(2)       | 1.38(1)         | C(2) - C(3)       | 1.38(1)         |
| C(2) - C(7)       | 1.40(1)         | C(2) - C(3)       | 1.45(1)         | C(2) - C(7)       | 1.39(1)         |
| C(3) - C(4)       | 1.38(2)         | C(2) - N(1)       | 1.34(1)         | C(3) - C(4)       | 1.38(1)         |
| C(3) - H(3)       | 0.95            | C(2) - N(2)       | 1.37(1)         | C(3) - H(3)       | 0.931           |
| C(4) - C(5)       | 1.40(2)         | C(3) - C(4)       | 1.40(1)         | C(4) - C(5)       | 1.40(1)         |
| C(4) - H(4)       | 0.95            | C(3) - C(8)       | 1.41(1)         | C(4) - H(4)       | 0.93            |
| C(5) - C(6)       | 1.40(1)         | C(4) - C(5)       | 1.38(1)         | C(5) - C(6)       | 1.38(1)         |
| C(5) - H(5)       | 0.95            | C(5) - C(6)       | 1.40(1)         | C(5) - H(5)       | 0.93            |
| C(6) - C(7)       | 1.38(1)         | C(5) – H(5)       | 0.93            | C(6) - C(7)       | 1.40(1)         |
| C(6) - H(6)       | 0.95            | C(6) - H(6)       | 0.93            | C(6) - H(6)       | 0.93            |
| C(7) - C(8)       | 1.46(1)         | C(6) - C(7)       | 1.38(2)         | C(7) - C(8)       | 1.46(1)         |
| C(8) - N(1)       | 1.34(1)         | C(7) - C(8)       | 1.40(1)         | C(8) - N(1)       | 1.349(9)        |
| C(8) - N(2)       | 1.37(1)         | C(7) - H(7)       | 0.93            | C(8) - N(2)       | 1.36(1)         |
|                   |                 | C(8) - H(8)       | 0.93            |                   |                 |

**Table S12.** Bond Lengths for  $\gamma$ -LnPc<sub>2</sub>

| NdPc <sub>2</sub>     |                       | SmPc <sub>2</sub>     |                       | GdPc <sub>2</sub>     |                       | TbPc <sub>2</sub>     |                       | DyPc <sub>2</sub>     |                       | YbPc <sub>2</sub>     |                       |
|-----------------------|-----------------------|-----------------------|-----------------------|-----------------------|-----------------------|-----------------------|-----------------------|-----------------------|-----------------------|-----------------------|-----------------------|
| Atom 1<br>– Atom<br>2 | Bond<br>Length<br>(Å) |
| Nd(1) -<br>N(2)       | 2.459(3)              | Sm(1) -<br>N(1)       | 2.451(3)              | Gd(1) -<br>N(1)       | 2.439(7)              | Tb(1) -<br>N(1)       | 2.406(5)              | Dy(1) -<br>N(1)       | 2.420(5)              | Yb(1) -<br>N(1)       | 2.361(5)              |
| Nd(1) -<br>N(4)       | 2.458(4)              | Sm(1) -<br>N(3)       | 2.438(3)              | Gd(1) -<br>N(3)       | 2.424(7)              | Tb(1) -<br>N(3)       | 2.409(5)              | Dy(1) -<br>N(3)       | 2.412(4)              | Yb(1) -<br>N(3)       | 2.382(5)              |
| Nd(1) -<br>N(6)       | 2.474(4)              | Sm(1) -<br>N(5)       | 2.444(3)              | Gd(1) -<br>N(5)       | 2.414(7)              | Tb(1) -<br>N(5)       | 2.397(5)              | Dy(1) -<br>N(5)       | 2.403(4)              | Yb(1) -<br>N(5)       | 2.392(5)              |
| Nd(1) -<br>N(8)       | 2.470(3)              | Sm(1) -<br>N(7)       | 2.428(4)              | Gd(1) -<br>N(7)       | 2.440(7)              | Tb(1) -<br>N(7)       | 2.415(5)              | Dy(1) -<br>N(7)       | 2.395(4)              | Yb(1) -<br>N(7)       | 2.362(5)              |
| Nd(1) -<br>N(10)      | 2.476(3)              | Sm(1) -<br>N(9)       | 2.439(3)              | Gd(1) -<br>N(9)       | 2.433(8)              | Tb(1) -<br>N(9)       | 2.401(5)              | Dy(1) -<br>N(9)       | 2.402(5)              | Yb(1) -<br>N(9)       | 2.386(5)              |
| Nd(1) -<br>N(12)      | 2.462(3)              | Sm(1) -<br>N(11)      | 2.431(3)              | Gd(1) -<br>N(11)      | 2.420(8)              | Tb(1) -<br>N(11)      | 2.426(5)              | Dy(1) -<br>N(11)      | 2.398(4)              | Yb(1) -<br>N(11)      | 2.368(5)              |
| Nd(1) -<br>N(14)      | 2.470(4)              | Sm(1) -<br>N(13)      | 2.454(3)              | Gd(1) -<br>N(13)      | 2.444(7)              | Tb(1) -<br>N(13)      | 2.418(4)              | Dy(1) -<br>N(13)      | 2.397(4)              | Yb(1) -<br>N(13)      | 2.376(5)              |
| Nd(1) -<br>N(16)      | 2.458(4)              | Sm(1) -<br>N(15)      | 2.448(3)              | Gd(1) -<br>N(15)      | 2.417(7)              | Tb(1) -<br>N(15)      | 2.403(4)              | Dy(1) -<br>N(15)      | 2.411(4)              | Yb(1) -<br>N(15)      | 2.375(5)              |
| C(1) -<br>C(2)        | 1.466(6)              | C(1) -<br>C(2)        | 1.470(6)              | C(1) -<br>C(2)        | 1.47(1)               | C(1) -<br>C(2)        | 1.475(8)              | C(1) -<br>C(2)        | 1.485(8)              | C(1) -<br>C(2)        | 1.455(8)              |
| C(1) -<br>N(1)        | 1.341(5)              | C(1) -<br>N(1)        | 1.369(5)              | C(1) -<br>N(1)        | 1.37(1)               | C(1) -<br>N(1)        | 1.370(8)              | C(1) -<br>N(1)        | 1.376(7)              | C(1) -<br>N(1)        | 1.364(7)              |
| C(1) -<br>N(2)        | 1.368(5)              | C(1) -<br>N(8)        | 1.338(5)              | C(1) -<br>N(8)        | 1.33(1)               | C(1) -<br>N(8)        | 1.335(8)              | C(1) -<br>N(8)        | 1.328(7)              | C(1) -<br>N(8)        | 1.347(8)              |
| C(2) -<br>C(3)        | 1.384(6)              | C(2) -<br>C(3)        | 1.389(6)              | C(2) -<br>C(3)        | 1.38(1)               | C(2) -<br>C(3)        | 1.365(8)              | C(2) -<br>C(3)        | 1.385(8)              | C(2) -<br>C(3)        | 1.386(8)              |
| C(2) -<br>C(7)        | 1.407(6)              | C(2) -<br>C(7)        | 1.394(6)              | C(2) -<br>C(7)        | 1.41(1)               | C(2) -<br>C(7)        | 1.397(8)              | C(2) -<br>C(7)        | 1.388(8)              | C(2) -<br>C(7)        | 1.404(9)              |
| C(3) -<br>C(4)        | 1.395(6)              | C(3) -<br>C(4)        | 1.396(6)              | C(3) -<br>C(4)        | 1.38(1)               | C(3) -<br>C(4)        | 1.396(9)              | C(3) -<br>C(4)        | 1.404(8)              | C(3) -<br>C(4)        | 1.40(1)               |
| C(3) -<br>H(3)        | 0.93                  | C(3) -<br>H(3)        | 0.95                  |
| C(4) -<br>C(5)        | 1.392(7)              | C(4) -<br>C(5)        | 1.379(6)              | C(4) -<br>C(5)        | 1.40(1)               | C(4) -<br>C(5)        | 1.380(1)              | C(4) -<br>C(5)        | 1.365(9)              | C(4) -<br>C(5)        | 1.40(1)               |
| C(4) -<br>H(4)        | 0.93                  | C(4) -<br>H(4)        | 0.95                  |
| C(5) -<br>C(6)        | 1.395(7)              | C(5) -<br>C(6)        | 1.399(6)              | C(5) -<br>C(6)        | 1.39(1)               | C(5) -<br>C(6)        | 1.388(9)              | C(5) -<br>C(6)        | 1.395(9)              | C(5) -<br>C(6)        | 1.398(9)              |
| C(5) -<br>H(5)        | 0.93                  | C(5) -<br>H(5)        | 0.95                  |

|               |          |               |          |               |         |               |          |               |          |               |          |
|---------------|----------|---------------|----------|---------------|---------|---------------|----------|---------------|----------|---------------|----------|
| C(6) - C(7)   | 1.379(5) | C(6) - C(7)   | 1.390(6) | C(6) - C(7)   | 1.39(1) | C(6) - C(7)   | 1.390(8) | C(6) - C(7)   | 1.389(9) | C(6) - C(7)   | 1.389(9) |
| C(6) - H(6)   | 0.93     | C(6) - H(6)   | 0.95     | C(6) - H(6)   | 0.95    | C(6) - H(6)   | 0.95     | C(6) - H(6)   | 0.95     | C(6) - H(6)   | 0.95     |
| C(7) - C(8)   | 1.460(6) | C(7) - C(8)   | 1.474(5) | C(7) - C(8)   | 1.47(1) | C(7) - C(8)   | 1.467(8) | C(7) - C(8)   | 1.464(8) | C(7) - C(8)   | 1.470(8) |
| C(8) - N(2)   | 1.370(5) | C(8) - N(1)   | 1.371(5) | C(8) - N(1)   | 1.38(1) | C(8) - N(1)   | 1.366(8) | C(8) - N(1)   | 1.363(7) | C(8) - N(1)   | 1.378(8) |
| C(8) - N(3)   | 1.339(5) | C(8) - N(2)   | 1.332(5) | C(8) - N(2)   | 1.31(1) | C(8) - N(2)   | 1.336(8) | C(8) - N(2)   | 1.333(7) | C(8) - N(2)   | 1.328(8) |
| C(9) - C(10)  | 1.464(6) | C(9) - C(10)  | 1.470(6) | C(9) - C(10)  | 1.47(1) | C(9) - C(10)  | 1.453(8) | C(9) - C(10)  | 1.479(8) | C(9) - C(10)  | 1.477(9) |
| C(9) - N(3)   | 1.336(5) | C(9) - N(2)   | 1.333(5) | C(9) - N(2)   | 1.35(1) | C(9) - N(2)   | 1.333(8) | C(9) - N(2)   | 1.319(8) | C(9) - N(2)   | 1.317(8) |
| C(9) - N(4)   | 1.374(5) | C(9) - N(3)   | 1.373(5) | C(9) - N(3)   | 1.37(1) | C(9) - N(3)   | 1.376(7) | C(9) - N(3)   | 1.372(7) | C(9) - N(3)   | 1.383(8) |
| C(10) - C(11) | 1.391(6) | C(10) - C(11) | 1.374(6) | C(10) - C(11) | 1.39(1) | C(10) - C(11) | 1.394(8) | C(10) - C(11) | 1.372(8) | C(10) - C(11) | 1.37(1)  |
| C(10) - C(15) | 1.402(6) | C(10) - C(15) | 1.402(6) | C(10) - C(15) | 1.41(1) | C(10) - C(15) | 1.394(9) | C(10) - C(15) | 1.399(8) | C(10) - C(15) | 1.411(8) |
| C(11) - C(12) | 1.388(6) | C(11) - C(12) | 1.404(6) | C(11) - C(12) | 1.39(1) | C(11) - C(12) | 1.380(1) | C(11) - C(12) | 1.380(9) | C(11) - C(12) | 1.39(1)  |
| C(11) - H(11) | 0.93     | C(11) - H(11) | 0.95     | C(11) - H(11) | 0.95    | C(11) - H(11) | 0.95     | C(11) - H(11) | 0.95     | C(11) - H(11) | 0.95     |
| C(12) - C(13) | 1.400(6) | C(12) - C(13) | 1.389(6) | C(12) - C(13) | 1.40(2) | C(12) - C(13) | 1.392(9) | C(12) - C(13) | 1.386(9) | C(12) - C(13) | 1.40(1)  |
| C(12) - H(12) | 0.93     | C(12) - H(12) | 0.95     | C(12) - H(12) | 0.95    | C(12) - H(12) | 0.95     | C(12) - H(12) | 0.95     | C(12) - H(12) | 0.95     |
| C(13) - C(14) | 1.393(7) | C(13) - C(14) | 1.384(6) | C(13) - C(14) | 1.39(1) | C(13) - C(14) | 1.395(9) | C(13) - C(14) | 1.40(1)  | C(13) - C(14) | 1.39(1)  |
| C(13) - H(13) | 0.93     | C(13) - H(13) | 0.95     | C(13) - H(13) | 0.95    | C(13) - H(13) | 0.95     | C(13) - H(13) | 0.95     | C(13) - H(13) | 0.95     |
| C(14) - C(15) | 1.376(7) | C(14) - C(15) | 1.384(6) | C(14) - C(15) | 1.38(1) | C(14) - C(15) | 1.380(9) | C(14) - C(15) | 1.370(9) | C(14) - C(15) | 1.380(9) |
| C(14) - H(14) | 0.93     | C(14) - H(14) | 0.95     | C(14) - H(14) | 0.95    | C(14) - H(14) | 0.95     | C(14) - H(14) | 0.95     | C(14) - H(14) | 0.95     |
| C(15) - C(16) | 1.462(6) | C(15) - C(16) | 1.468(6) | C(15) - C(16) | 1.46(1) | C(15) - C(16) | 1.481(8) | C(15) - C(16) | 1.470(8) | C(15) - C(16) | 1.473(8) |
| C(16) - N(4)  | 1.367(5) | C(16) - N(3)  | 1.367(5) | C(16) - N(3)  | 1.36(1) | C(16) - N(3)  | 1.376(8) | C(16) - N(3)  | 1.377(7) | C(16) - N(3)  | 1.386(7) |
| C(16) - N(5)  | 1.344(5) | C(16) - N(4)  | 1.338(5) | C(16) - N(4)  | 1.33(1) | C(16) - N(4)  | 1.327(8) | C(16) - N(4)  | 1.330(7) | C(16) - N(4)  | 1.309(8) |
| C(17) -       | 1.481(6) | C(17) -       | 1.467(5) | C(17) -       | 1.47(1) | C(17) -       | 1.462(8) | C(17) -       | 1.472(7) | C(17) -       | 1.460(9) |

|               |          |               |          |               |         |               |          |               |          |               |          |
|---------------|----------|---------------|----------|---------------|---------|---------------|----------|---------------|----------|---------------|----------|
| C(18)         |          | C(18)         |          | C(18)         |         | C(18)         |          | C(18)         |          | C(18)         |          |
| C(17) - N(5)  | 1.331(5) | C(17) - N(4)  | 1.332(5) | C(17) - N(4)  | 1.34(1) | C(17) - N(4)  | 1.336(8) | C(17) - N(4)  | 1.337(7) | C(17) - N(4)  | 1.329(8) |
| C(17) - N(6)  | 1.371(5) | C(17) - N(5)  | 1.372(5) | C(17) - N(5)  | 1.37(1) | C(17) - N(5)  | 1.377(7) | C(17) - N(5)  | 1.368(7) | C(17) - N(5)  | 1.367(8) |
| C(18) - C(19) | 1.379(6) | C(18) - C(19) | 1.390(5) | C(18) - C(19) | 1.38(1) | C(18) - C(19) | 1.368(8) | C(18) - C(19) | 1.380(8) | C(18) - C(19) | 1.390(9) |
| C(18) - C(23) | 1.405(6) | C(18) - C(23) | 1.400(5) | C(18) - C(23) | 1.41(1) | C(18) - C(23) | 1.409(8) | C(18) - C(23) | 1.408(8) | C(18) - C(23) | 1.395(9) |
| C(19) - C(20) | 1.395(6) | C(19) - C(20) | 1.389(6) | C(19) - C(20) | 1.40(1) | C(19) - C(20) | 1.395(9) | C(19) - C(20) | 1.383(8) | C(19) - C(20) | 1.39(1)  |
| C(19) - H(19) | 0.93     | C(19) - H(19) | 0.95     | C(19) - H(19) | 0.95    | C(19) - H(19) | 0.95     | C(19) - H(19) | 0.95     | C(19) - H(19) | 0.95     |
| C(20) - C(21) | 1.388(6) | C(20) - C(21) | 1.389(6) | C(20) - C(21) | 1.38(1) | C(20) - C(21) | 1.385(9) | C(20) - C(21) | 1.387(9) | C(20) - C(21) | 1.39(1)  |
| C(20) - H(20) | 0.93     | C(20) - H(20) | 0.95     | C(20) - H(20) | 0.95    | C(20) - H(20) | 0.95     | C(20) - H(20) | 0.95     | C(20) - H(20) | 0.95     |
| C(21) - C(22) | 1.388(6) | C(21) - C(22) | 1.395(6) | C(21) - C(22) | 1.41(1) | C(21) - C(22) | 1.392(9) | C(21) - C(22) | 1.401(8) | C(21) - C(22) | 1.397(9) |
| C(21) - H(21) | 0.93     | C(21) - H(21) | 0.95     | C(21) - H(21) | 0.95    | C(21) - H(21) | 0.95     | C(21) - H(21) | 0.95     | C(21) - H(21) | 0.95     |
| C(22) - C(23) | 1.382(6) | C(22) - C(23) | 1.384(6) | C(22) - C(23) | 1.37(1) | C(22) - C(23) | 1.384(8) | C(22) - C(23) | 1.378(7) | C(22) - C(23) | 1.397(9) |
| C(22) - H(22) | 0.93     | C(22) - H(22) | 0.95     | C(22) - H(22) | 0.95    | C(22) - H(22) | 0.95     | C(22) - H(22) | 0.95     | C(22) - H(22) | 0.95     |
| C(23) - C(24) | 1.468(6) | C(23) - C(24) | 1.476(6) | C(23) - C(24) | 1.46(1) | C(23) - C(24) | 1.465(8) | C(23) - C(24) | 1.454(7) | C(23) - C(24) | 1.467(8) |
| C(24) - N(6)  | 1.364(5) | C(24) - N(5)  | 1.372(5) | C(24) - N(5)  | 1.38(1) | C(24) - N(5)  | 1.373(8) | C(24) - N(5)  | 1.370(7) | C(24) - N(5)  | 1.381(8) |
| C(24) - N(7)  | 1.331(6) | C(24) - N(6)  | 1.329(5) | C(24) - N(6)  | 1.33(1) | C(24) - N(6)  | 1.327(8) | C(24) - N(6)  | 1.335(7) | C(24) - N(6)  | 1.328(8) |
| C(25) - C(26) | 1.466(6) | C(25) - C(26) | 1.462(5) | C(25) - C(26) | 1.48(1) | C(25) - C(26) | 1.463(9) | C(25) - C(26) | 1.462(8) | C(25) - C(26) | 1.447(9) |
| C(25) - N(7)  | 1.331(6) | C(25) - N(6)  | 1.339(5) | C(25) - N(6)  | 1.33(1) | C(25) - N(6)  | 1.343(8) | C(25) - N(6)  | 1.335(7) | C(25) - N(6)  | 1.338(8) |
| C(25) - N(8)  | 1.365(5) | C(25) - N(7)  | 1.373(5) | C(25) - N(7)  | 1.37(1) | C(25) - N(7)  | 1.363(8) | C(25) - N(7)  | 1.382(7) | C(25) - N(7)  | 1.370(8) |
| C(26) - C(27) | 1.381(6) | C(26) - C(27) | 1.380(6) | C(26) - C(27) | 1.39(1) | C(26) - C(27) | 1.388(9) | C(26) - C(27) | 1.376(8) | C(26) - C(27) | 1.39(1)  |
| C(26) - C(31) | 1.395(6) | C(26) - C(31) | 1.406(5) | C(26) - C(31) | 1.40(1) | C(26) - C(31) | 1.396(9) | C(26) - C(31) | 1.414(8) | C(26) - C(31) | 1.399(8) |
| C(27) - H(27) | 0.93     | C(27) - C(28) | 1.390(6) | C(27) - C(28) | 1.39(1) | C(27) - C(28) | 1.393(9) | C(27) - C(28) | 1.395(8) | C(27) - C(28) | 1.40(1)  |

|               |          |               |          |               |         |               |          |               |          |               |          |
|---------------|----------|---------------|----------|---------------|---------|---------------|----------|---------------|----------|---------------|----------|
| C(27) - C(28) | 1.392(6) | C(27) - H(27) | 0.95     | C(27) - H(27) | 0.95    | C(27) - H(27) | 0.95     | C(27) - H(27) | 0.95     | C(27) - H(27) | 0.95     |
| C(28) - C(29) | 1.402(7) | C(28) - C(29) | 1.391(6) | C(28) - C(29) | 1.40(1) | C(28) - C(29) | 1.380(1) | C(28) - C(29) | 1.376(8) | C(28) - C(29) | 1.384(9) |
| C(28) - H(28) | 0.93     | C(28) - H(28) | 0.951    | C(28) - H(28) | 0.95    | C(28) - H(28) | 0.95     | C(28) - H(28) | 0.95     | C(28) - H(28) | 0.95     |
| C(29) - H(30) | 1.384(7) | C(29) - C(30) | 1.389(6) | C(29) - C(30) | 1.38(1) | C(29) - C(30) | 1.406(9) | C(29) - C(30) | 1.414(9) | C(29) - C(30) | 1.40(1)  |
| C(29) - H(29) | 0.929    | C(29) - H(29) | 0.95     | C(29) - H(29) | 0.95    | C(29) - H(29) | 0.95     | C(29) - H(29) | 0.95     | C(29) - H(29) | 0.95     |
| C(30) - C(31) | 1.386(6) | C(30) - C(31) | 1.385(5) | C(30) - C(31) | 1.39(1) | C(30) - C(31) | 1.381(8) | C(30) - C(31) | 1.372(9) | C(30) - C(31) | 1.379(9) |
| C(30) - H(30) | 0.93     | C(30) - H(30) | 0.95     | C(30) - H(30) | 0.95    | C(30) - H(30) | 0.95     | C(30) - H(30) | 0.95     | C(30) - H(30) | 0.95     |
| C(31) - C(32) | 1.476(6) | C(31) - C(32) | 1.472(5) | C(31) - C(32) | 1.47(1) | C(31) - C(32) | 1.475(8) | C(31) - C(32) | 1.446(7) | C(31) - C(32) | 1.470(9) |
| C(32) - N(1)  | 1.330(5) | C(32) - N(7)  | 1.372(5) | C(32) - N(7)  | 1.35(1) | C(32) - N(7)  | 1.376(8) | C(32) - N(7)  | 1.377(7) | C(32) - N(7)  | 1.394(7) |
| C(32) - N(8)  | 1.370(5) | C(32) - N(8)  | 1.332(5) | C(32) - N(8)  | 1.34(1) | C(32) - N(8)  | 1.329(8) | C(32) - N(8)  | 1.340(7) | C(32) - N(8)  | 1.325(7) |
| C(33) - C(34) | 1.472(6) | C(33) - C(34) | 1.469(5) | C(33) - C(34) | 1.47(1) | C(33) - C(34) | 1.466(9) | C(33) - C(34) | 1.475(8) | C(33) - C(34) | 1.481(8) |
| C(33) - N(9)  | 1.335(5) | C(33) - N(9)  | 1.369(5) | C(33) - N(9)  | 1.37(1) | C(33) - N(9)  | 1.379(7) | C(33) - N(9)  | 1.371(7) | C(33) - N(9)  | 1.379(8) |
| C(33) - N(10) | 1.366(5) | C(33) - N(16) | 1.340(5) | C(33) - N(16) | 1.33(1) | C(33) - N(16) | 1.334(8) | C(33) - N(16) | 1.343(7) | C(33) - N(16) | 1.322(8) |
| C(34) - C(35) | 1.384(6) | C(34) - C(35) | 1.380(6) | C(34) - C(35) | 1.39(1) | C(34) - C(35) | 1.384(9) | C(34) - C(35) | 1.346(8) | C(34) - C(35) | 1.389(9) |
| C(34) - C(39) | 1.397(6) | C(34) - C(39) | 1.402(6) | C(34) - C(39) | 1.41(1) | C(34) - C(39) | 1.406(8) | C(34) - C(39) | 1.404(8) | C(34) - C(39) | 1.392(9) |
| C(35) - C(36) | 1.393(6) | C(35) - C(36) | 1.389(6) | C(35) - C(36) | 1.39(1) | C(35) - C(36) | 1.389(9) | C(35) - C(36) | 1.417(9) | C(35) - C(36) | 1.406(9) |
| C(35) - H(35) | 0.93     | C(35) - H(35) | 0.95     | C(35) - H(35) | 0.95    | C(35) - H(35) | 0.95     | C(35) - H(35) | 0.95     | C(35) - H(35) | 0.95     |
| C(36) - C(37) | 1.391(7) | C(36) - C(37) | 1.393(6) | C(36) - C(37) | 1.40(1) | C(36) - C(37) | 1.388(9) | C(36) - C(37) | 1.379(9) | C(36) - C(37) | 1.40(1)  |
| C(36) - H(36) | 0.93     | C(36) - H(36) | 0.95     | C(36) - H(36) | 0.95    | C(36) - H(36) | 0.95     | C(36) - H(36) | 0.95     | C(36) - H(36) | 0.95     |
| C(37) - C(38) | 1.400(7) | C(37) - C(38) | 1.399(6) | C(37) - C(38) | 1.40(1) | C(37) - C(38) | 1.402(9) | C(37) - C(38) | 1.386(9) | C(37) - C(38) | 1.42(1)  |
| C(37) - H(37) | 0.93     | C(37) - H(37) | 0.95     | C(37) - H(37) | 0.95    | C(37) - H(37) | 0.95     | C(37) - H(37) | 0.95     | C(37) - H(37) | 0.95     |
| C(38) -       | 1.388(6) | C(38) -       | 1.378(5) | C(38) -       | 1.40(1) | C(38) -       | 1.376(9) | C(38) -       | 1.389(8) | C(38) -       | 1.376(9) |



|               |          |               |          |               |         |               |          |               |          |               |          |
|---------------|----------|---------------|----------|---------------|---------|---------------|----------|---------------|----------|---------------|----------|
| C(39)         |          | C(39)         |          | C(39)         |         | C(39)         |          | C(39)         |          | C(39)         |          |
| C(38) - H(38) | 0.93     | C(38) - H(38) | 0.95     | C(38) - H(38) | 0.95    | C(38) - H(38) | 0.95     | C(38) - H(38) | 0.95     | C(38) - H(38) | 0.95     |
| C(39) - C(40) | 1.470(5) | C(39) - C(40) | 1.463(5) | C(39) - C(40) | 1.47(1) | C(39) - C(40) | 1.457(8) | C(39) - C(40) | 1.470(8) | C(39) - C(40) | 1.471(9) |
| C(40) - N(10) | 1.371(6) | C(40) - N(9)  | 1.372(5) | C(40) - N(9)  | 1.47(1) | C(40) - N(9)  | 1.371(8) | C(40) - N(9)  | 1.375(7) | C(40) - N(9)  | 1.372(7) |
| C(40) - N(11) | 1.337(6) | C(40) - N(10) | 1.331(5) | C(40) - N(10) | 1.34(1) | C(40) - N(10) | 1.346(7) | C(40) - N(10) | 1.328(7) | C(41) - C(42) | 1.462(9) |
| C(41) - C(42) | 1.468(6) | C(41) - C(42) | 1.465(5) | C(41) - C(42) | 1.46(1) | C(41) - C(42) | 1.483(8) | C(41) - C(42) | 1.463(8) | C(41) - N(10) | 1.326(8) |
| C(41) - N(11) | 1.343(5) | C(41) - N(10) | 1.336(5) | C(41) - N(10) | 1.33(1) | C(41) - N(10) | 1.318(8) | C(41) - N(10) | 1.329(7) | C(41) - N(11) | 1.382(8) |
| C(41) - N(12) | 1.365(5) | C(41) - N(11) | 1.385(5) | C(41) - N(11) | 1.37(1) | C(41) - N(11) | 1.374(8) | C(41) - N(11) | 1.383(7) | C(42) - C(43) | 1.390(9) |
| C(42) - C(43) | 1.382(6) | C(42) - C(43) | 1.381(6) | C(42) - C(43) | 1.39(1) | C(42) - C(43) | 1.389(8) | C(42) - C(43) | 1.395(8) | C(42) - C(47) | 1.397(9) |
| C(42) - C(47) | 1.397(6) | C(42) - C(47) | 1.409(5) | C(42) - C(47) | 1.41(1) | C(42) - C(47) | 1.392(8) | C(42) - C(47) | 1.399(8) | C(43) - C(44) | 1.39(1)  |
| C(43) - C(44) | 1.397(7) | C(43) - C(44) | 1.382(6) | C(43) - C(44) | 1.39(1) | C(43) - C(44) | 1.393(9) | C(43) - C(44) | 1.381(9) | C(43) - H(43) | 0.95     |
| C(43) - H(43) | 0.93     | C(43) - H(43) | 0.95     | C(43) - H(43) | 0.95    | C(43) - H(43) | 0.95     | C(43) - H(43) | 0.95     | C(44) - C(45) | 1.400(9) |
| C(44) - C(45) | 1.395(7) | C(44) - C(45) | 1.386(6) | C(44) - C(45) | 1.39(1) | C(45) - C(45) | 1.390(1) | C(44) - C(45) | 1.389(9) | C(44) - H(44) | 0.95     |
| C(44) - H(44) | 0.929    | C(44) - H(44) | 0.95     | C(44) - H(44) | 0.95    | C(44) - H(44) | 0.95     | C(44) - H(44) | 0.95     | C(45) - C(46) | 1.381(9) |
| C(45) - C(46) | 1.380(6) | C(45) - C(46) | 1.402(6) | C(45) - C(46) | 1.40(1) | C(45) - C(46) | 1.390(9) | C(45) - C(46) | 1.401(8) | C(45) - H(45) | 0.95     |
| C(45) - H(45) | 0.93     | C(45) - H(45) | 0.95     | C(45) - H(45) | 0.95    | C(45) - H(45) | 0.95     | C(45) - H(45) | 0.95     | C(46) - C(47) | 1.388(9) |
| C(46) - C(47) | 1.394(6) | C(46) - C(47) | 1.375(6) | C(46) - C(47) | 1.39(1) | C(46) - C(47) | 1.391(9) | C(46) - C(47) | 1.382(8) | C(46) - H(46) | 0.95     |
| C(46) - H(46) | 0.93     | C(46) - H(46) | 0.95     | C(46) - H(46) | 0.95    | C(46) - H(46) | 0.95     | C(46) - H(46) | 0.95     | C(47) - C(48) | 1.461(9) |
| C(47) - C(48) | 1.464(6) | C(47) - C(48) | 1.455(6) | C(47) - C(48) | 1.48(1) | C(47) - C(48) | 1.463(8) | C(47) - C(48) | 1.477(8) | C(48) - N(11) | 1.368(8) |
| C(48) - N(12) | 1.364(5) | C(48) - N(11) | 1.368(5) | C(48) - N(11) | 1.38(1) | C(48) - N(11) | 1.360(7) | C(48) - N(11) | 1.372(8) | C(48) - N(12) | 1.342(8) |
| C(48) - N(13) | 1.335(5) | C(48) - N(12) | 1.347(5) | C(48) - N(12) | 1.33(1) | C(48) - N(12) | 1.328(8) | C(48) - N(12) | 1.324(7) | C(49) - C(50) | 1.457(8) |
| C(49) - C(50) | 1.459(6) | C(49) - C(50) | 1.485(5) | C(49) - C(50) | 1.47(1) | C(49) - C(50) | 1.479(8) | C(49) - C(50) | 1.468(7) | C(49) - N(12) | 1.340(8) |

|               |          |               |          |               |         |               |          |               |          |               |          |
|---------------|----------|---------------|----------|---------------|---------|---------------|----------|---------------|----------|---------------|----------|
| C(49) - N(13) | 1.343(6) | C(49) - N(12) | 1.326(5) | C(49) - N(12) | 1.35(1) | C(49) - N(12) | 1.321(8) | C(49) - N(12) | 1.339(7) | C(49) - N(13) | 1.386(9) |
| C(49) - N(14) | 1.372(5) | C(49) - N(13) | 1.372(5) | C(49) - N(13) | 1.36(1) | C(49) - N(13) | 1.375(7) | C(49) - N(13) | 1.376(7) | C(50) - C(51) | 1.38(1)  |
| C(50) - C(51) | 1.392(6) | C(50) - C(51) | 1.385(5) | C(50) - C(51) | 1.38(1) | C(50) - C(51) | 1.381(8) | C(50) - C(51) | 1.370(8) | C(50) - C(55) | 1.400(9) |
| C(50) - C(55) | 1.395(6) | C(50) - C(55) | 1.392(6) | C(50) - C(55) | 1.41(1) | C(50) - C(55) | 1.392(8) | C(50) - C(55) | 1.404(8) | C(51) - C(52) | 1.399(9) |
| C(51) - C(52) | 1.391(6) | C(51) - C(52) | 1.400(6) | C(51) - C(52) | 1.40(1) | C(51) - C(52) | 1.383(9) | C(51) - C(52) | 1.391(8) | C(51) - H(51) | 0.949    |
| C(51) - H(51) | 0.93     | C(51) - H(51) | 0.95     | C(51) - H(51) | 0.95    | C(51) - H(51) | 0.95     | C(51) - H(51) | 0.95     | C(52) - C(53) | 1.39(1)  |
| C(52) - C(53) | 1.390(6) | C(52) - C(53) | 1.383(6) | C(52) - C(53) | 1.40(1) | C(52) - C(53) | 1.380(1) | C(52) - C(53) | 1.381(9) | C(52) - H(52) | 0.95     |
| C(52) - H(52) | 0.93     | C(52) - H(52) | 0.95     | C(52) - H(52) | 0.95    | C(52) - H(52) | 0.95     | C(52) - H(52) | 0.95     | C(53) - C(54) | 1.39(1)  |
| C(53) - C(54) | 1.408(6) | C(53) - C(54) | 1.386(6) | C(53) - C(54) | 1.39(1) | C(53) - C(54) | 1.400(1) | C(53) - C(54) | 1.390(8) | C(53) - H(53) | 0.95     |
| C(53) - H(53) | 0.931    | C(53) - H(53) | 0.95     | C(53) - H(53) | 0.95    | C(53) - H(53) | 0.95     | C(53) - H(53) | 0.95     | C(54) - C(55) | 1.390(8) |
| C(54) - C(55) | 1.391(6) | C(54) - C(55) | 1.392(6) | C(54) - C(55) | 1.38(1) | C(54) - C(55) | 1.380(1) | C(54) - C(55) | 1.388(8) | C(54) - H(54) | 0.95     |
| C(54) - H(54) | 0.929    | C(54) - H(54) | 0.95     | C(54) - H(54) | 0.95    | C(54) - H(54) | 0.95     | C(54) - H(54) | 0.95     | C(55) - C(56) | 1.465(8) |
| C(55) - C(56) | 1.477(6) | C(55) - C(56) | 1.467(5) | C(55) - C(56) | 1.47(1) | C(55) - C(56) | 1.471(8) | C(55) - C(56) | 1.470(7) | C(56) - N(13) | 1.384(8) |
| C(56) - N(14) | 1.368(5) | C(56) - N(13) | 1.364(5) | C(56) - N(13) | 1.37(1) | C(56) - N(13) | 1.371(7) | C(56) - N(13) | 1.369(7) | C(56) - N(14) | 1.324(9) |
| C(56) - N(15) | 1.333(6) | C(56) - N(14) | 1.333(5) | C(56) - N(14) | 1.34(1) | C(56) - N(14) | 1.334(8) | C(56) - N(14) | 1.336(7) | C(57) - C(58) | 1.464(9) |
| C(57) - C(58) | 1.460(6) | C(57) - C(58) | 1.467(6) | C(57) - C(58) | 1.46(1) | C(57) - C(58) | 1.472(8) | C(57) - C(58) | 1.475(8) | C(57) - N(14) | 1.327(8) |
| C(57) - N(15) | 1.340(6) | C(57) - N(14) | 1.329(5) | C(57) - N(14) | 1.33(1) | C(57) - N(14) | 1.334(7) | C(57) - N(14) | 1.336(8) | C(57) - N(15) | 1.377(8) |
| C(57) - N(16) | 1.373(5) | C(57) - N(15) | 1.368(4) | C(57) - N(15) | 1.37(1) | C(57) - N(15) | 1.378(7) | C(57) - N(15) | 1.365(7) | C(58) - C(59) | 1.382(9) |
| C(58) - C(59) | 1.389(7) | C(58) - C(59) | 1.383(6) | C(58) - C(59) | 1.38(1) | C(58) - C(59) | 1.377(9) | C(58) - C(59) | 1.379(8) | C(58) - C(63) | 1.415(9) |
| C(58) - C(63) | 1.402(6) | C(58) - C(63) | 1.396(6) | C(58) - C(63) | 1.41(1) | C(58) - C(63) | 1.405(8) | C(58) - C(63) | 1.393(8) | C(59) - C(60) | 1.39(1)  |
| C(59) - C(60) | 1.391(6) | C(59) - C(60) | 1.388(6) | C(59) - C(60) | 1.40(2) | C(59) - C(60) | 1.392(9) | C(59) - C(60) | 1.401(9) | C(59) - H(59) | 0.95     |
| C(59) -       | 0.93     | C(59) -       | 0.95     | C(59) -       | 0.95    | C(59) -       | 0.95     | C(59) -       | 0.95     | C(60) -       | 1.38(1)  |

|               |          |               |          |               |         |               |          |               |          |               |          |
|---------------|----------|---------------|----------|---------------|---------|---------------|----------|---------------|----------|---------------|----------|
| H(59)         |          | H(59)         |          | H(59)         |         | H(59)         |          | H(59)         |          | C(61)         |          |
| C(60) - C(61) | 1.391(6) | C(60) - C(61) | 1.393(6) | C(60) - C(61) | 1.39(1) | C(60) - C(61) | 1.390(1) | C(60) - C(61) | 1.383(9) | C(60) - H(60) | 0.95     |
| C(60) - H(60) | 0.93     | C(60) - H(60) | 0.95     | C(60) - H(60) | 0.95    | C(60) - H(60) | 0.95     | C(60) - H(60) | 0.95     | C(61) - C(62) | 1.42(1)  |
| C(61) - C(62) | 1.385(6) | C(61) - C(62) | 1.385(6) | C(61) - C(62) | 1.40(1) | C(61) - C(62) | 1.401(9) | C(61) - C(62) | 1.400(9) | C(61) - H(61) | 0.95     |
| C(61) - H(61) | 0.93     | C(61) - H(61) | 0.95     | C(61) - H(61) | 0.95    | C(61) - H(61) | 0.95     | C(61) - H(61) | 0.95     | C(62) - C(63) | 1.37(1)  |
| C(62) - C(63) | 1.392(6) | C(62) - C(63) | 1.382(7) | C(62) - C(63) | 1.39(1) | C(62) - C(63) | 1.389(7) | C(62) - C(63) | 1.393(8) | C(62) - H(62) | 0.95     |
| C(62) - H(62) | 0.93     | C(62) - H(62) | 0.95     | C(62) - H(62) | 0.95    | C(62) - H(62) | 0.95     | C(62) - H(62) | 0.95     | C(62) - H(62) | 0.95     |
| C(63) - C(64) | 1.475(6) | C(63) - C(64) | 1.382(7) | C(63) - C(64) | 1.47(1) | C(63) - C(64) | 1.452(8) | C(63) - C(64) | 1.475(7) | C(63) - C(64) | 1.468(9) |
| C(64) - N(9)  | 1.334(5) | C(64) - N(15) | 1.379(5) | C(64) - N(15) | 1.37(1) | C(64) - N(15) | 1.367(7) | C(64) - N(15) | 1.361(7) | C(64) - N(15) | 1.380(8) |
| C(64) - N(16) | 1.366(5) | C(64) - N(16) | 1.331(5) | C(64) - N(16) | 1.33(1) | C(64) - N(16) | 1.334(8) | C(64) - N(16) | 1.325(7) | C(64) - N(16) | 1.324(8) |

**Table S13.** Bond Lengths for  $\delta$ -LnPc<sub>2</sub>

| PrPc <sub>2</sub> |                  | NdPc <sub>2</sub> |                 | SmPc <sub>2</sub> |                 | GdPc <sub>2</sub> |                 | TbPc <sub>2</sub> |                 |
|-------------------|------------------|-------------------|-----------------|-------------------|-----------------|-------------------|-----------------|-------------------|-----------------|
| Atom 1 – Atom 2   | Bond Lengths (Å) | Atom 1 – Atom 2   | Bond Length (Å) | Atom 1 – Atom 2   | Bond Length (Å) | Atom 1 – Atom 2   | Bond Length (Å) | Atom 1 – Atom 2   | Bond Length (Å) |
| Pr(1) - N(1)      | 2.476            | Nd(1) - N(2)      | 2.473           | Sm(1) - N(2)      | 2.457           | Gd(1) - N(2)      | 2.431           | Tb(1) - N(2)      | 2.426           |
| Pr(1) - N(3)      | 2.481            | Nd(1) - N(4)      | 2.471           | Sm(1) - N(4)      | 2.444           | Gd(1) - N(4)      | 2.436           | Tb(1) - N(4)      | 2.424           |
| Pr(1) - N(5)      | 2.487            | Nd(1) - N(6)      | 2.468           | Sm(1) - N(6)      | 2.445           | Gd(1) - N(6)      | 2.422           | Tb(1) - N(6)      | 2.417           |
| Pr(1) - N(7)      | 2.473            | Nd(1) - N(8)      | 2.466           | Sm(1) - N(8)      | 2.451           | Gd(1) - N(8)      | 2.431           | Tb(1) - N(8)      | 2.425           |
| C(1) - C(2)       | 1.460(3)         | C(1) - C(2)       | 1.463(6)        | C(1) - C(2)       | 1.465(2)        | C(1) - C(2)       | 1.465(6)        | C(1) - C(2)       | 1.460(6)        |
| C(1) - N(1)       | 1.367(3)         | C(1) - N(1)       | 1.343(5)        | C(1) - N(1)       | 1.336(2)        | C(1) - N(1)       | 1.339(5)        | C(1) - N(1)       | 1.334(6)        |
| C(1) - N(8)       | 1.335(3)         | C(1) - N(2)       | 1.366(5)        | C(1) - N(2)       | 1.369(2)        | C(1) - N(2)       | 1.373(5)        | C(1) - N(2)       | 1.361(6)        |
| C(2) - C(3)       | 1.388(3)         | C(2) - C(3)       | 1.383(6)        | C(2) - C(3)       | 1.388(2)        | C(2) - C(3)       | 1.382(6)        | C(2) - C(3)       | 1.389(6)        |
| C(2) - C(7)       | 1.400(3)         | C(2) - C(7)       | 1.394(6)        | C(2) - C(7)       | 1.401(2)        | C(2) - C(7)       | 1.394(6)        | C(2) - C(7)       | 1.406(6)        |
| C(3) - C(4)       | 1.397(3)         | C(3) - C(4)       | 1.388(6)        | C(3) - C(4)       | 1.396(2)        | C(3) - C(4)       | 1.395(6)        | C(3) - C(4)       | 1.399(6)        |
| C(3) - H(3)       | 0.95             | C(3) - H(1)       | 0.93            | C(3) - H(3)       | 0.95            | C(3) - H(3)       | 0.95            | C(3) - H(3)       | 0.95            |
| C(4) -            | 1.398(3)         | C(4) -            | 1.385(6)        | C(4) -            | 1.403(2)        | C(4) -            | 1.386(6)        | C(4) -            | 1.395(7)        |

|               |          |               |          |               |          |               |          |               |          |
|---------------|----------|---------------|----------|---------------|----------|---------------|----------|---------------|----------|
| C(5)          |          |
| C(4) - H(4)   | 0.95     | C(4) - H(2)   | 0.93     | C(4) - H(4)   | 0.95     | C(4) - H(4)   | 0.95     | C(4) - H(4)   | 0.95     |
| C(5) - C(6)   | 1.387(3) | C(5) - C(6)   | 1.382(6) | C(5) - C(6)   | 1.395(2) | C(5) - C(6)   | 1.395(6) | C(5) - C(6)   | 1.393(6) |
| C(5) - H(5)   | 0.95     | C(5) - H(3)   | 0.93     | C(5) - H(5)   | 0.95     | C(5) - H(5)   | 0.95     | C(5) - H(5)   | 0.949    |
| C(6) - C(7)   | 1.390(3) | C(6) - C(7)   | 1.388(6) | C(6) - C(7)   | 1.392(2) | C(6) - C(7)   | 1.387(5) | C(6) - C(7)   | 1.377(6) |
| C(6) - H(6)   | 0.95     | C(6) - H(4)   | 0.929    | C(6) - H(6)   | 0.95     | C(6) - H(6)   | 0.95     | C(6) - H(6)   | 0.95     |
| C(7) - C(8)   | 1.463(3) | C(7) - C(8)   | 1.458(6) | C(7) - C(8)   | 1.471(2) | C(7) - C(8)   | 0.95     | C(7) - C(8)   | 1.471(6) |
| C(8) - N(1)   | 1.369(3) | C(8) - N(2)   | 1.375(5) | C(8) - N(2)   | 1.371(2) | C(8) - N(2)   | 1.370(5) | C(8) - N(2)   | 1.371(6) |
| C(8) - N(2)   | 1.336(3) | C(8) - N(3)   | 1.340(5) | C(8) - N(3)   | 1.339(2) | C(8) - N(3)   | 1.329(5) | C(8) - N(3)   | 1.339(6) |
| C(9) - C(10)  | 1.464(3) | C(9) - C(10)  | 1.462(6) | C(9) - C(10)  | 1.470(2) | C(9) - C(10)  | 1.461(6) | C(9) - C(10)  | 1.467(6) |
| C(9) - N(2)   | 1.337(3) | C(9) - N(3)   | 1.329(5) | C(9) - N(3)   | 1.338(2) | C(9) - N(3)   | 1.332(5) | C(9) - N(3)   | 1.337(5) |
| C(9) - N(3)   | 1.370(3) | C(9) - N(4)   | 1.370(5) | C(9) - N(4)   | 1.372(2) | C(9) - N(4)   | 1.368(5) | C(9) - N(4)   | 1.379(6) |
| C(10) - C(11) | 1.391(3) | C(10) - C(11) | 1.389(6) | C(10) - C(11) | 1.388(2) | C(10) - C(11) | 1.389(6) | C(10) - C(11) | 1.383(6) |
| C(10) - C(15) | 1.396(3) | C(10) - C(15) | 1.399(6) | C(10) - C(15) | 1.402(2) | C(10) - C(15) | 1.404(5) | C(10) - C(15) | 1.390(6) |
| C(11) -       | 1.393(3) | C(11) -       | 1.384(6) | C(11) -       | 1.397(2) | C(11) -       | 1.392(6) | C(11) -       | 1.402(7) |

|               |          |               |          |               |          |               |          |               |          |
|---------------|----------|---------------|----------|---------------|----------|---------------|----------|---------------|----------|
| C(12)         |          |
| C(11) - H(11) | 0.95     | C(11) - H(5)  | 0.93     | C(11) - H(11) | 0.95     | C(11) - H(11) | 0.95     | C(11) - H(11) | 0.95     |
| C(12) - C(13) | 1.394(3) | C(12) - C(13) | 1.391(6) | C(12) - C(13) | 1.399(2) | C(12) - C(13) | 1.398(6) | C(12) - C(13) | 1.376(6) |
| C(12) - H(12) | 0.95     | C(12) - H(6)  | 0.93     | C(12) - H(12) | 0.95     | C(12) - H(12) | 0.95     | C(12) - H(12) | 0.95     |
| C(13) - C(14) | 1.392(3) | C(13) - C(14) | 1.393(6) | C(13) - C(14) | 1.393(2) | C(13) - C(14) | 1.392(6) | C(13) - C(14) | 1.387(6) |
| C(13) - H(13) | 0.95     | C(13) - H(7)  | 0.93     | C(13) - H(13) | 0.95     | C(13) - H(13) | 0.95     | C(13) - H(13) | 0.95     |
| C(14) - C(15) | 1.389(3) | C(14) - C(15) | 1.387(6) | C(14) - C(15) | 1.390(2) | C(14) - C(15) | 1.388(6) | C(14) - C(15) | 1.386(6) |
| C(14) - H(14) | 0.95     | C(14) - H(8)  | 0.93     | C(14) - H(14) |          | C(14) - H(14) | 0.95     | C(14) - H(14) | 0.95     |
| C(15) - C(16) | 1.464(3) | C(15) - C(16) | 1.476(6) | C(15) - C(16) | 1.463(2) | C(15) - C(16) | 1.465(6) | C(15) - C(16) | 1.451(6) |
| C(16) - N(3)  | 1.369(3) | C(16) - N(4)  | 1.368(5) | C(16) - N(4)  | 1.372(2) | C(16) - N(4)  | 1.362(5) | C(16) - N(4)  | 1.361(5) |
| C(16) - N(4)  | 1.336(3) | C(16) - N(5)  | 1.335(5) | C(16) - N(5)  | 1.337(2) | C(16) - N(5)  | 1.341(5) | C(16) - N(5)  | 1.339(6) |
| C(17) - C(18) | 1.463(3) | C(17) - C(18) | 1.466(6) | C(17) - C(18) | 1.467(2) | C(17) - C(18) | 1.742(5) | C(17) - C(18) | 1.460(6) |
| C(17) - N(4)  | 1.336(3) | C(17) - N(5)  | 1.340(5) | C(17) - N(5)  | 1.334(2) | C(17) - N(5)  | 1.342(5) | C(17) - N(5)  | 1.337(6) |
| C(17) - N(5)  | 1.365(3) | C(17) - N(6)  | 1.365(5) | C(17) - N(6)  | 1.372(2) | C(17) - N(6)  | 1.370(5) | C(17) - N(6)  | 1.373(5) |

|               |          |               |          |               |          |               |          |               |          |
|---------------|----------|---------------|----------|---------------|----------|---------------|----------|---------------|----------|
| C(18) - C(19) | 1.388(3) | C(18) - C(19) | 1.382(6) | C(18) - C(19) | 1.392(2) | C(18) - C(19) | 1.369(5) | C(18) - C(19) | 1.388(6) |
| C(18) - C(23) | 1.400(3) | C(18) - C(23) | 1.395(6) | C(18) - C(23) | 1.400(2) | C(18) - C(23) | 1.406(5) | C(18) - C(23) | 1.394(6) |
| C(19) - C(20) | 1.391(3) | C(19) - C(20) | 1.391(6) | C(19) - C(20) | 1.394(2) | C(19) - C(20) | 1.396(6) | C(19) - C(20) | 1.391(6) |
| C(19) - H(19) | 0.95     | C(19) - H(9)  | 0.931    | C(19) - H(19) | 0.95     | C(19) - H(19) | 0.95     | C(19) - H(19) | 0.95     |
| C(20) - C(21) | 1.399(3) | C(20) - C(21) | 1.388(6) | C(20) - C(21) | 1.404(2) | C(20) - C(21) | 1.388(6) | C(20) - C(21) | 1.396(7) |
| C(20) - H(20) | 0.95     | C(20) - H(10) | 0.93     | C(20) - H(20) | 0.95     | C(20) - H(20) | 0.95     | C(20) - H(20) | 0.95     |
| C(21) - C(22) | 1.393(3) | C(21) - C(22) | 1.384(6) | C(21) - C(22) | 1.391(2) | C(21) - C(22) | 1.393(6) | C(21) - C(22) | 1.383(6) |
| C(21) - H(21) | 0.95     | C(21) - H(11) | 0.93     | C(21) - H(21) | 0.95     | C(21) - H(21) | 0.95     | C(21) - H(21) | 0.95     |
| C(22) - C(23) | 1.390(3) | C(22) - C(23) | 1.382(6) | C(22) - C(23) | 1.389(2) | C(22) - C(23) | 1.386(5) | C(22) - C(23) | 1.386(6) |
| C(22) - H(22) | 0.95     | C(22) - H(12) | 0.93     | C(22) - H(22) | 0.95     | C(22) - H(22) | 0.95     | C(22) - H(22) | 0.95     |
| C(23) - C(24) | 1.470(3) | C(23) - C(24) | 1.460(6) | C(23) - C(24) | 1.469(2) | C(23) - C(24) | 1.464(5) | C(23) - C(24) | 1.473(6) |
| C(24) - N(5)  | 1.369(3) | C(24) - N(6)  | 1.365(5) | C(24) - N(6)  | 1.369(2) | C(24) - N(6)  | 1.369(5) | C(24) - N(6)  | 1.365(5) |
| C(24) - N(6)  | 1.337(3) | C(24) - N(7)  | 1.336(5) | C(24) - N(7)  | 1.337(2) | C(24) - N(7)  | 1.336(5) | C(24) - N(7)  | 1.337(6) |

|               |          |               |          |               |          |               |          |               |          |
|---------------|----------|---------------|----------|---------------|----------|---------------|----------|---------------|----------|
| C(25) - C(26) | 1.471(3) | C(25) - C(26) | 1.468(6) | C(25) - C(26) | 1.470(2) | C(25) - C(26) | 1.461(6) | C(25) - C(26) | 1.466(6) |
| C(25) - N(6)  | 1.338(3) | C(25) - N(7)  | 1.335(5) | C(25) - N(7)  | 1.337(2) | C(25) - N(7)  | 1.332(5) | C(25) - N(7)  | 1.334(6) |
| C(25) - N(7)  | 1.374(3) | C(25) - N(8)  | 1.367(5) | C(25) - N(8)  | 1.370(2) | C(25) - N(8)  | 1.368(5) | C(25) - N(8)  | 1.369(5) |
| C(26) - C(27) | 1.384(3) | C(26) - C(27) | 1.384(6) | C(26) - C(27) | 1.391(2) | C(26) - C(27) | 1.384(5) | C(26) - C(27) | 1.393(6) |
| C(26) - C(31) | 1.397(3) | C(26) - C(31) | 1.387(6) | C(26) - C(31) | 1.399(2) | C(26) - C(31) | 1.398(5) | C(26) - C(31) | 1.385(6) |
| C(27) - C(28) | 1.395(3) | C(27) - C(28) | 1.376(6) | C(27) - C(28) | 1.398(2) | C(27) - C(28) | 1.402(6) | C(27) - C(28) | 1.391(7) |
| C(27) - H(27) | 0.95     | C(27) - H(13) | 0.93     | C(27) - H(27) | 0.95     | C(27) - H(27) | 0.95     | C(27) - H(27) | 0.949    |
| C(28) - C(29) | 1.393(3) | C(28) - C(29) | 1.394(6) | C(28) - C(29) | 1.399(2) | C(28) - C(29) | 1.400(6) | C(28) - C(29) | 1.388(7) |
| C(28) - H(28) | 0.95     | C(28) - H(14) | 0.93     | C(28) - H(28) | 0.95     | C(28) - H(28) | 0.95     | C(28) - H(28) | 0.95     |
| C(29) - C(30) | 1.393(3) | C(29) - C(30) | 1.379(6) | C(29) - C(30) | 1.369(2) | C(29) - C(30) | 1.374(6) | C(29) - C(30) | 1.396(7) |
| C(29) - H(29) | 0.95     | C(29) - H(15) | 0.931    | C(29) - H(29) | 0.95     | C(29) - H(29) | 0.95     | C(29) - H(29) | 0.95     |
| C(30) - C(31) | 1.388(3) | C(30) - C(31) | 1.383(5) | C(30) - C(31) | 1.389(2) | C(30) - C(31) | 1.382(6) | C(30) - C(31) | 1.385(6) |
| C(30) - H(30) | 0.95     | C(30) - H(16) | 0.93     | C(30) - H(30) | 0.95     | C(30) - H(30) | 0.95     | C(30) - H(30) | 0.95     |



|                  |          |                  |          |                  |          |                  |          |                  |          |
|------------------|----------|------------------|----------|------------------|----------|------------------|----------|------------------|----------|
| C(31) -<br>C(32) | 1.458(3) | C(31) -<br>C(32) | 1.475(5) | C(31) -<br>C(32) | 1.466(2) | C(31) -<br>C(32) | 1.459(6) | C(31) -<br>C(32) | 1.462(6) |
| C(32) -<br>N(7)  | 1.368(3) | C(32) -<br>N(1)  | 1.334(5) | C(32) -<br>N(1)  | 1.336(2) | C(32) -<br>N(1)  | 1.334(5) | C(32) -<br>N(1)  | 1.327(6) |
| C(32) -<br>N(8)  | 1.337(3) | C(32) -<br>N(8)  | 1.369(5) | C(32) -<br>N(8)  | 1.370(2) | C(32) -<br>N(8)  | 1.368(5) | C(32) -<br>N(8)  | 1.371(6) |

**Table S14. Bond Lengths for LnPc<sub>2</sub>·CH<sub>2</sub>Cl<sub>2</sub>**

| LaPc <sub>2</sub>     |                       | PrPc <sub>2</sub>     |                       | NdPc <sub>2</sub>     |                       | SmPc <sub>2</sub>     |                       | GdPc <sub>2</sub>     |                       | TbPc <sub>2</sub>     |                       | DyPc <sub>2</sub>     |                       | ErPc <sub>2</sub>     |                       | YbPc <sub>2</sub>     |                       |
|-----------------------|-----------------------|-----------------------|-----------------------|-----------------------|-----------------------|-----------------------|-----------------------|-----------------------|-----------------------|-----------------------|-----------------------|-----------------------|-----------------------|-----------------------|-----------------------|-----------------------|-----------------------|
| Atom 1<br>- Atom<br>2 | Bond<br>Length<br>(Å) |
| La(1) -<br>N(1)       | 2.442                 | Pr(1) -<br>N(1)       | 2.458                 | Nd(1) -<br>N(2)       | 2.463                 | Sm(1) -<br>N(1)       | 2.481                 | Gd(1) -<br>N(1)       | 2.438                 | Tb(1) -<br>N(1)       | 2.438                 | Dy(1) -<br>N(3)       | 2.408                 | Er(1) -<br>N(2)       | 2.384                 | Yb(1) -<br>N(1)       | 2.384                 |
| La(1) -<br>N(3)       | 2.426                 | Pr(1) -<br>N(3)       | 2.476                 | Nd(1) -<br>N(4)       | 2.470                 | Sm(1) -<br>N(3)       | 2.462                 | Gd(1) -<br>N(3)       | 2.422                 | Tb(1) -<br>N(3)       | 2.428                 | Dy(1) -<br>N(5)       | 2.415                 | Er(1) -<br>N(4)       | 2.390                 | Yb(1) -<br>N(3)       | 2.371                 |
| La(1) -<br>N(5)       | 2.440                 | Pr(1) -<br>N(5)       | 2.486                 | Nd(1) -<br>N(6)       | 2.477                 | Sm(1) -<br>N(5)       | 2.476                 | Gd(1) -<br>N(5)       | 2.431                 | Tb(1) -<br>N(5)       | 2.439                 | Dy(1) -<br>N(7)       | 2.410                 | Er(1) -<br>N(6)       | 2.403                 | Yb(1) -<br>N(5)       | 2.394                 |
| La(1) -<br>N(7)       | 2.431                 | Pr(1) -<br>N(6)       | 2.475                 | Nd(1) -<br>N(8)       | 2.462                 | Sm(1) -<br>N(7)       | 2.471                 | Gd(1) -<br>N(7)       | 2.430                 | Tb(1) -<br>N(7)       | 2.433                 | Dy(1) -<br>N(8)       | 2.426                 | Er(1) -<br>N(8)       | 2.388                 | Yb(1) -<br>N(7)       | 2.384                 |
| La(1) -<br>N(9)       | 2.430                 | Pr(1) -<br>N(9)       | 2.480                 | Nd(1) -<br>N(10)      | 2.477                 | Sm(1) -<br>N(9)       | 2.465                 | Gd(1) -<br>N(9)       | 2.427                 | Tb(1) -<br>N(10)      | 2.432                 | Dy(1) -<br>N(9)       | 2.407                 | Er(1) -<br>N(10)      | 2.395                 | Yb(1) -<br>N(9)       | 2.379                 |
| C(1) -<br>C(1)        | 1.399(5)              | C(1) -<br>C(1)        | 1.392(4)              | C(1) -<br>C(2)        | 1.459(3)              | C(1) -<br>C(1)        | 1.375(6)              | C(1) -<br>C(1)        | 1.390(1)              | C(1) -<br>C(1)        | 1.398(3)              | C(10) -<br>C(12)      | 1.400(7)              | C(1) -<br>C(2)        | 1.465(6)              | C(1) -<br>C(1)        | 1.390(1)              |
| C(1) -<br>C(2)        | 1.396(5)              | C(1) -<br>C(2)        | 1.394(3)              | C(1) -<br>N(1)        | 1.339                 | C(1) -<br>C(2)        | 1.403(5)              | C(1) -<br>C(2)        | 1.382(8)              | C(1) -<br>C(2)        | 1.396(2)              | C(10) -<br>C(G)       | 1.394(7)              | C(1) -<br>N(1)        | 1.335                 | C(1) -<br>C(2)        | 1.385(9)              |
| C(1) -<br>H(1)        | 0.95                  | C(1) -<br>H(1)        | 0.95                  | C(1) -<br>N(2)        | 1.368(3)              | C(1) -<br>H(1)        | 0.95                  | C(1) -<br>H(1)        | 0.931                 | C(1) -<br>H(1)        | 0.95                  | C(10) -<br>H(10)      | 0.929                 | C(1) -<br>N(2)        | 1.367(6)              | C(1) -<br>H(1)        | 0.95                  |
| C(2) -<br>C(3)        | 1.386(4)              | C(2) -<br>C(3)        | 1.391(3)              | C(2) -<br>C(3)        | 1.393(3)              | C(2) -<br>C(3)        | 1.381(5)              | C(2) -<br>C(3)        | 1.390(8)              | C(2) -<br>C(3)        | 1.389(2)              | C(11) -<br>C(16)      | 1.376(7)              | C(2) -<br>C(3)        | 1.387(6)              | C(2) -<br>C(3)        | 1.386(9)              |
| C(2) -<br>H(2)        | 0.95                  | C(2) -<br>H(2)        | 0.95                  | C(2) -<br>C(7)        | 1.401(3)              | C(2) -<br>H(2)        | 0.95                  | C(2) -<br>H(2)        | 0.929                 | C(2) -<br>H(2)        | 0.95                  | C(11) -<br>C(R)       | 1.387(7)              | C(2) -<br>C(7)        | 1.391(6)              | C(2) -<br>H(2)        | 0.949                 |
| C(3) -<br>C(3)        | 1.409(3)              | C(3) -<br>C(3)        | 1.399(3)              | C(3) -<br>C(4)        | 1.391(4)              | C(3) -<br>C(3)        | 1.403(5)              | C(3) -<br>C(3)        | 1.382(6)              | C(3) -<br>C(3)        | 1.402(2)              | C(11) -<br>H(11)      | 0.93                  | C(3) -<br>C(4)        | 1.391(6)              | C(3) -<br>C(3)        | 1.400(1)              |
| C(3) -<br>C(4)        | 1.467(4)              | C(3) -<br>C(4)        | 1.464(3)              | C(3) -<br>H(3)        | 0.95                  | C(3) -<br>C(4)        | 1.470(4)              | C(3) -<br>C(4)        | 1.464(7)              | C(3) -<br>C(4)        | 1.468(2)              | C(12) -<br>C(K)       | 1.380(7)              | C(3) -<br>H(3)        | 0.95                  | C(3) -<br>C(4)        | 1.470(8)              |
| C(4) -<br>N(1)        | 1.367                 | C(4) -<br>N(1)        | 1.368                 | C(4) -<br>C(5)        | 1.403(4)              | C(4) -<br>N(1)        | 1.365                 | C(4) -<br>N(1)        | 1.369                 | C(4) -<br>N(1)        | 1.371                 | C(12) -<br>H(12)      | 0.93                  | C(4) -<br>C(5)        | 1.397(6)              | C(4) -<br>N(1)        | 1.363                 |

|               |          |               |          |               |          |               |          |               |          |               |          |               |          |               |          |               |          |
|---------------|----------|---------------|----------|---------------|----------|---------------|----------|---------------|----------|---------------|----------|---------------|----------|---------------|----------|---------------|----------|
| C(4) - N(2)   | 1.337(4) | C(4) - N(2)   | 1.340(3) | C(4) - H(4)   | 0.95     | C(4) - N(2)   | 1.338(4) | C(4) - N(2)   | 1.333(6) | C(4) - N(2)   | 1.338(2) | C(13) - C(15) | 1.393(7) | C(4) - H(4)   | 0.95     | C(4) - N(2)   | 1.341(8) |
| C(5) - C(6)   | 1.456(4) | C(5) - C(6)   | 1.469(3) | C(5) - C(6)   | 1.391(3) | C(5) - C(6)   | 1.470(5) | C(5) - C(6)   | 1.465(7) | C(5) - C(6)   | 1.468(2) | C(13) - C(U)  | 1.379(7) | C(5) - C(6)   | 1.395(6) | C(5) - C(6)   | 1.470(1) |
| C(5) - N(2)   | 1.337(4) | C(5) - N(2)   | 1.342(2) | C(5) - H(5)   | 0.95     | C(5) - N(2)   | 1.335(4) | C(5) - N(2)   | 1.355(7) | C(5) - N(2)   | 1.338(2) | C(13) - H(13) | 0.93     | C(5) - H(5)   | 0.949    | C(5) - N(2)   | 1.340(7) |
| C(5) - N(3)   | 1.372(4) | C(5) - N(3)   | 1.364(2) | C(6) - C(7)   | 1.388(3) | C(5) - N(3)   | 1.368(4) | C(5) - N(3)   | 1.368(6) | C(5) - N(3)   | 1.368(2) | C(14) - C(16) | 1.407(8) | C(6) - C(7)   | 1.394(6) | C(5) - N(3)   | 1.361(8) |
| C(6) - C(7)   | 1.392(5) | C(6) - C(7)   | 1.387(3) | C(6) - H(6)   | 0.95     | C(6) - C(7)   | 1.384(5) | C(6) - C(7)   | 1.386(8) | C(6) - C(7)   | 1.387(2) | C(14) - C(Q)  | 1.386(7) | C(6) - H(6)   | 0.95     | C(6) - C(7)   | 1.390(1) |
| C(6) - C(11)  | 1.398(4) | C(6) - C(11)  | 1.402(3) | C(7) - C(8)   | 1.471(3) | C(6) - C(11)  | 1.399(5) | C(6) - C(11)  | 1.413(8) | C(6) - C(11)  | 1.399(2) | C(14) - H(14) | 0.931    | C(7) - C(8)   | 1.458(6) | C(6) - C(11)  | 1.405(8) |
| C(7) - C(8)   | 1.395(4) | C(7) - C(8)   | 1.395(3) | C(8) - N(2)   | 1.369(3) | C(7) - C(8)   | 1.395(5) | C(7) - C(8)   | 1.339(9) | C(7) - C(8)   | 1.398(2) | C(15) - C(X)  | 1.387(7) | C(8) - N(2)   | 1.383(5) | C(7) - C(8)   | 1.380(1) |
| C(7) - H(7)   | 0.95     | C(7) - H(7)   | 0.95     | C(8) - N(3)   | 1.339(3) | C(7) - H(7)   | 0.95     | C(7) - H(7)   | 0.93     | C(7) - H(7)   | 0.95     | C(15) - H(15) | 0.931    | C(8) - N(3)   | 1.333(6) | C(7) - H(7)   | 0.95     |
| C(8) - C(9)   | 1.401(5) | C(8) - C(9)   | 1.400(3) | C(9) - C(10)  | 1.466(3) | C(8) - C(9)   | 1.399(6) | C(8) - C(9)   | 1.420(1) | C(8) - C(9)   | 1.401(2) | C(16) - H(16) | 0.931    | C(9) - C(10)  | 1.475(6) | C(8) - C(9)   | 1.420(1) |
| C(8) - H(8)   | 0.95     | C(8) - H(8)   | 0.95     | C(9) - N(3)   | 1.340(3) | C(8) - H(8)   | 0.95     | C(8) - H(8)   | 0.93     | C(8) - H(8)   | 0.95     | C(17) - C(17) | 1.389(6) | C(9) - N(3)   | 1.342(6) | C(8) - H(8)   | 0.951    |
| C(9) - C(10)  | 1.389(5) | C(9) - C(10)  | 1.939(3) | C(9) - N(4)   | 1.371(3) | C(9) - C(10)  | 1.390(5) | C(9) - C(10)  | 1.390(1) | C(9) - C(10)  | 1.396(2) | C(17) - C(T)  | 1.379(7) | C(9) - N(4)   | 1.362(6) | C(9) - C(10)  | 1.360(1) |
| C(9) - H(9)   | 0.95     | C(9) - H(9)   | 0.95     | C(10) - C(11) | 1.390(3) | C(9) - H(9)   | 0.95     | C(9) - H(9)   | 0.93     | C(9) - H(9)   | 0.95     | C(17) - H(17) | 0.93     | C(10) - C(11) | 1.387(6) | C(9) - H(9)   | 0.951    |
| C(10) - C(11) | 1.389(5) | C(10) - C(11) | 1.386(3) | C(10) - C(15) | 1.395(3) | C(10) - C(11) | 1.387(5) | C(10) - C(11) | 1.376(9) | C(10) - C(11) | 1.385(2) | C(18) - C(18) | 1.398(6) | C(10) - C(15) | 1.395(6) | C(10) - C(11) | 1.390(1) |
| C(10) - H(10) | 0.95     | C(10) - H(10) | 0.95     | C(11) - C(12) | 1.390(3) | C(10) - H(10) | 0.95     | C(10) - H(10) | 0.929    | C(10) - H(10) | 0.95     | C(18) - C(Z)  | 1.384(8) | C(11) - C(12) | 1.392(6) | C(10) - H(10) | 0.95     |
| C(11) - C(12) | 1.469(4) | C(11) - C(12) | 1.468(3) | C(11) - H(11) | 0.95     | C(11) - C(12) | 1.462(5) | C(11) - C(12) | 1.476(8) | C(11) - C(12) | 1.467(2) | C(18) - H(18) | 0.93     | C(11) - H(11) | 0.95     | C(11) - C(12) | 1.460(1) |
| C(12) -       | 1.367(4) | C(12) -       | 1.371(2) | C(12) -       | 1.394(4) | C(12) -       | 1.375(4) | C(12) -       | 1.360(6) | C(12) -       | 1.371(2) | C(D) -        | 1.385(6) | C(12) -       | 1.402(6) | C(12) -       | 1.386(8) |

|               |          |               |          |               |          |               |          |               |          |               |          |             |          |               |          |               |          |
|---------------|----------|---------------|----------|---------------|----------|---------------|----------|---------------|----------|---------------|----------|-------------|----------|---------------|----------|---------------|----------|
| N(3)          | )        | N(3)          | )        | C(13)         | )        | N(3)          | )        | N(3)          | )        | N(3)          | )        | C(D)        | )        | C(13)         | )        | N(3)          | )        |
| C(12) - N(4)  | 1.340(4) | C(12) - N(4)  | 1.335(2) | C(12) - H(12) | 0.95     | C(12) - N(4)  | 1.334(4) | C(12) - N(4)  | 1.335(6) | C(12) - N(4)  | 1.336(2) | C(D) - C(N) | 1.471(7) | C(12) - H(12) | 0.95     | C(12) - N(4)  | 1.325(8) |
| C(13) - C(14) | 1.468(4) | C(13) - C(14) | 1.466(3) | C(13) - C(14) | 1.388(4) | C(13) - C(14) | 1.469(4) | C(13) - C(14) | 1.466(7) | C(13) - C(14) | 1.467(2) | C(D) - C(Z) | 1.389(8) | C(13) - C(14) | 1.394(6) | C(13) - C(14) | 1.464(8) |
| C(13) - N(4)  | 1.337(4) | C(13) - N(4)  | 1.339(2) | C(13) - H(13) | 0.95     | C(13) - N(4)  | 1.333(4) | C(13) - N(4)  | 1.337(8) | C(13) - N(4)  | 1.335(2) | C(E) - C(G) | 1.386(7) | C(13) - H(13) | 0.95     | C(13) - N(4)  | 1.347(8) |
| C(13) - N(5)  | 1.366    | C(13) - N(5)  | 1.370    | C(14) - C(15) | 1.381(3) | C(13) - N(5)  | 1.368    | C(13) - N(5)  | 1.376    | C(13) - N(5)  | 1.371    | C(E) - C(S) | 1.404(7) | C(14) - C(15) | 1.388(6) | C(13) - N(5)  | 1.367    |
| C(14) - C(15) | 1.390(4) | C(14) - C(15) | 1.392(3) | C(14) - H(14) | 0.95     | C(14) - C(14) | 1.406(5) | C(14) - C(14) | 1.387(6) | C(14) - C(14) | 1.405(2) | C(E) - C(O) | 1.458(7) | C(14) - H(14) | 0.95     | C(14) - C(14) | 1.420(1) |
| C(14) - C(14) | 1.393(5) | C(14) - C(14) | 1.405(3) | C(15) - C(16) | 1.468(3) | C(14) - C(15) | 1.389(5) | C(14) - C(15) | 1.393(8) | C(14) - C(15) | 1.391(2) | C(F) - C(R) | 1.457(7) | C(15) - C(16) | 1.465(6) | C(14) - C(15) | 1.393(9) |
| C(15) - C(16) | 1.401(5) | C(15) - C(16) | 1.391(3) | C(16) - N(4)  | 1.366(3) | C(15) - C(16) | 1.387(5) | C(15) - C(16) | 1.388(8) | C(15) - C(16) | 1.397(2) | C(F) - N(3) | 1.381(6) | C(16) - N(4)  | 1.373(5) | C(15) - C(16) | 1.375(9) |
| C(15) - H(15) | 0.95     | C(15) - H(15) | 0.95     | C(16) - N(5)  | 1.335    | C(15) - H(15) | 0.95     | C(15) - H(15) | 0.931    | C(15) - H(15) | 0.95     | C(F) - N(A) | 1.339(6) | C(16) - N(5)  | 1.338    | C(15) - H(15) | 0.949    |
| C(16) - C(16) | 1.396(5) | C(16) - C(16) | 1.399(4) | C(17) - C(18) | 1.467(3) | C(16) - C(16) | 1.398(6) | C(16) - C(16) | 1.390(1) | C(16) - C(16) | 1.399(3) | C(G) - H(G) | 0.93     | C(17) - C(18) | 1.470(6) | C(16) - C(16) | 1.380(1) |
| C(16) - H(16) | 0.95     | C(16) - H(16) | 0.95     | C(17) - N(6)  | 1.370    | C(16) - H(16) | 0.95     | C(16) - H(16) | 0.93     | C(16) - H(16) | 0.95     | C(H) - C(J) | 1.460(7) | C(17) - N(6)  | 1.361    | C(16) - H(16) | 0.949    |
| C(17) - C(18) | 1.465(4) | C(17) - C(18) | 1.468(2) | C(17) - N(7)  | 1.334(3) | C(17) - C(18) | 1.470(5) | C(17) - C(18) | 1.460(7) | C(17) - C(18) | 1.469(2) | C(H) - C(M) | 1.398(7) | C(17) - N(7)  | 1.337(6) | C(17) - C(18) | 1.463(9) |
| C(17) - N(6)  | 1.338    | C(17) - N(6)  | 1.374(2) | C(18) - C(18) | 1.398(4) | C(17) - N(6)  | 1.326    | C(17) - N(6)  | 1.323    | C(17) - N(6)  | 1.334(2) | C(H) - C(U) | 1.393(7) | C(18) - C(18) | 1.394(6) | C(17) - N(6)  | 1.323    |
| C(17) - N(7)  | 1.368(4) | C(17) - N(10) | 1.333(2) | C(18) - C(19) | 1.395(3) | C(17) - N(7)  | 1.365(4) | C(17) - N(7)  | 1.369(3) | C(17) - N(7)  | 1.372(2) | C(J) - N(4) | 1.323    | C(18) - C(19) | 1.394(6) | C(17) - N(7)  | 1.389(8) |
| C(18) - C(19) | 1.389(4) | C(18) - C(19) | 1.389(3) | C(19) - C(20) | 1.389(4) | C(18) - C(19) | 1.389(4) | C(18) - C(19) | 1.394(7) | C(18) - C(19) | 1.392(2) | C(J) - N(7) | 1.377(6) | C(19) - C(20) | 1.391(6) | C(18) - C(19) | 1.393(8) |

|               |          |               |          |               |          |               |          |               |          |               |          |              |          |               |          |               |          |
|---------------|----------|---------------|----------|---------------|----------|---------------|----------|---------------|----------|---------------|----------|--------------|----------|---------------|----------|---------------|----------|
| C(18) - C(23) | 1.397(4) | C(18) - C(23) | 1.402(3) | C(19) - H(19) | 0.95     | C(18) - C(23) | 1.399(4) | C(18) - C(23) | 1.391(7) | C(18) - C(23) | 1.399(2) | C(I) - C(L)  | 1.458(7) | C(19) - H(19) | 0.95     | C(18) - C(23) | 1.395(9) |
| C(19) - C(20) | 1.389(5) | C(19) - C(20) | 1.390(3) | C(20) - C(20) | 1.392(4) | C(19) - C(20) | 1.389(5) | C(19) - C(20) | 1.370(1) | C(19) - C(20) | 1.392(2) | C(I) - C(I)  | 1.385(6) | C(20) - C(20) | 1.395(6) | C(19) - C(20) | 1.370(1) |
| C(19) - H(19) | 0.95     | C(19) - H(19) | 0.95     | C(20) - H(20) | 0.95     | C(19) - H(19) | 0.95     | C(19) - H(19) | 0.931    | C(19) - H(19) | 0.95     | C(I) - C(T)  | 1.394(7) | C(20) - H(20) | 0.95     | C(19) - H(19) | 0.95     |
| C(20) - C(21) | 1.399(5) | C(20) - C(21) | 1.402(3) | C(21) - C(22) | 1.465(3) | C(20) - C(21) | 1.395(5) | C(20) - C(21) | 1.389(9) | C(20) - C(21) | 1.400(2) | C(K) - C(S)  | 1.379(7) | C(21) - C(22) | 1.461(6) | C(20) - C(21) | 1.405(9) |
| C(20) - H(20) | 0.95     | C(20) - H(20) | 0.95     | C(21) - N(7)  | 1.332(3) | C(20) - H(20) | 0.95     | C(20) - H(20) | 0.931    | C(20) - H(20) | 0.95     | C(K) - H(K)  | 0.93     | C(21) - N(7)  | 1.343(6) | C(20) - H(20) | 0.95     |
| C(21) - C(22) | 1.392(4) | C(21) - C(22) | 1.395(3) | C(21) - N(8)  | 1.374(3) | C(21) - C(22) | 1.389(5) | C(21) - C(22) | 1.375(8) | C(21) - C(22) | 1.393(2) | C(L) - N(5)  | 1.381    | C(21) - N(8)  | 1.373(6) | C(21) - C(22) | 1.412(9) |
| C(21) - H(21) | 0.95     | C(21) - H(21) | 0.95     | C(22) - C(23) | 1.388(4) | C(21) - H(21) | 0.95     | C(21) - H(21) | 0.931    | C(21) - H(21) | 0.95     | C(L) - N(A)  | 1.336(6) | C(22) - C(23) | 1.391(6) | C(21) - H(21) | 0.949    |
| C(22) - C(23) | 1.392(5) | C(22) - C(23) | 1.385(3) | C(22) - C(27) | 1.398(4) | C(22) - C(23) | 1.389(5) | C(22) - C(23) | 1.391(7) | C(22) - C(23) | 1.390(2) | C(M) - C(W)  | 1.465(7) | C(22) - C(27) | 1.396(6) | C(22) - C(23) | 1.380(1) |
| C(22) - H(22) | 0.95     | C(22) - H(22) | 0.95     | C(23) - C(24) | 1.389(4) | C(22) - H(22) | 0.95     | C(22) - H(22) | 0.93     | C(22) - H(22) | 0.95     | C(M) - C(X)  | 1.385(7) | C(23) - C(24) | 1.397(7) | C(22) - H(22) | 0.951    |
| C(23) - C(24) | 1.468(4) | C(23) - C(24) | 1.465(3) | C(23) - H(23) | 0.95     | C(23) - C(24) | 1.464(4) | C(23) - C(24) | 1.461(7) | C(23) - C(24) | 1.461(2) | C(N) - N(8)  | 1.366    | C(23) - H(23) | 0.95     | C(23) - C(24) | 1.469(9) |
| C(24) - N(7)  | 1.361(4) | C(24) - N(6)  | 1.369(2) | C(24) - C(25) | 1.399(4) | C(24) - N(7)  | 1.367(4) | C(24) - N(7)  | 1.372(6) | C(24) - N(7)  | 1.369(2) | C(N) - N(30) | 1.337(6) | C(24) - C(25) | 1.413(7) | C(24) - N(7)  | 1.356(8) |
| C(24) - N(8)  | 1.347(4) | C(24) - N(7)  | 1.338    | C(24) - H(24) | 0.95     | C(24) - N(8)  | 1.339(4) | C(24) - N(8)  | 1.336(6) | C(24) - N(8)  | 1.335    | C(O) - N(6)  | 1.330(6) | C(24) - H(24) | 0.951    | C(24) - N(8)  | 1.343(8) |
| C(25) - C(26) | 1.459(4) | C(25) - C(26) | 1.463(3) | C(25) - C(26) | 1.391(4) | C(25) - C(26) | 1.468(4) | C(25) - C(26) | 1.459(7) | C(25) - C(26) | 1.463(2) | C(O) - N(9)  | 1.380(6) | C(25) - C(26) | 1.382(7) | C(25) - C(26) | 1.471(9) |
| C(25) - N(8)  | 1.336(4) | C(25) - N(8)  | 1.338    | C(25) - H(25) | 0.95     | C(25) - N(8)  | 1.336(4) | C(25) - N(8)  | 1.333(6) | C(25) - N(9)  | 1.334    | C(P) - C(Y)  | 1.463(7) | C(25) - H(25) | 0.95     | C(25) - N(8)  | 1.364(8) |
| C(25) - N(9)  | 1.373(4) | C(25) - N(9)  | 1.368(2) | C(26) - C(27) | 1.386(4) | C(25) - N(9)  | 1.370(4) | C(25) - N(9)  | 1.366(6) | C(25) - N(10) | 1.371(2) | C(P) - N(3)  | 1.367(6) | C(26) - C(27) | 1.388(6) | C(25) - N(9)  | 1.361(8) |
| C(26) -       | 1.389(4) | C(26) -       | 1.391(3) | C(26) -       | 0.95     | C(26) -       | 1.385(5) | C(26) -       | 1.385(7) | C(26) -       | 1.392(2) | C(P) -       | 1.338(7) | C(26) -       | 0.95     | C(26) -       | 1.390(1) |

|               |          |               |          |               |          |               |          |               |          |               |          |               |          |               |          |               |          |
|---------------|----------|---------------|----------|---------------|----------|---------------|----------|---------------|----------|---------------|----------|---------------|----------|---------------|----------|---------------|----------|
| C(27)         | )        | C(27)         | )        | H(26)         |          | C(27)         | )        | C(27)         | )        | C(27)         | )        | N(30)         | )        | H(26)         |          | C(27)         | )        |
| C(26) - C(31) | 1.396(4) | C(26) - C(31) | 1.401(3) | C(27) - C(28) | 1.464(3) | C(26) - C(31) | 1.398(4) | C(26) - C(31) | 1.392(7) | C(26) - C(31) | 1.401(2) | C(Q) - C(Y)   | 1.385(7) | C(27) - C(28) | 1.464(6) | C(26) - C(31) | 1.396(9) |
| C(27) - C(28) | 1.393(4) | C(27) - C(28) | 1.391(3) | C(28) - N(8)  | 1.366(3) | C(27) - C(28) | 1.396(5) | C(27) - C(28) | 1.381(8) | C(27) - C(28) | 1.392(2) | C(Q) - H(Q)   | 0.93     | C(28) - N(8)  | 1.378(6) | C(27) - C(28) | 1.389(8) |
| C(27) - H(27) | 0.95     | C(27) - H(27) | 0.95     | C(28) - N(9)  | 1.342(3) | C(27) - H(27) | 0.95     | C(27) - H(27) | 0.93     | C(27) - C(28) | 0.95     | C(R) - C(Y)   | 1.399(7) | C(28) - N(9)  | 1.338(6) | C(27) - H(27) | 0.949    |
| C(28) - C(29) | 1.398(4) | C(28) - C(29) | 1.402(3) | C(29) - C(30) | 1.468(3) | C(28) - C(29) | 1.408(5) | C(28) - C(29) | 1.387(9) | C(28) - C(29) | 1.403(2) | C(S) - C(V)   | 1.454(7) | C(29) - C(30) | 1.470(6) | C(28) - C(29) | 1.399(9) |
| C(28) - H(28) | 0.95     | C(28) - H(28) | 0.95     | C(29) - N(9)  | 1.340(3) | C(28) - H(28) | 0.95     | C(28) - H(28) | 0.93     | C(28) - H(28) | 0.95     | C(T) - H(T)   | 0.931    | C(29) - N(9)  | 1.333(6) | C(28) - H(28) | 0.949    |
| C(29) - C(30) | 1.389(5) | C(29) - C(30) | 1.398(3) | C(29) - N(10) | 1.368    | C(29) - C(30) | 1.390(5) | C(29) - C(30) | 1.378(8) | C(29) - C(30) | 1.396(2) | C(U) - H(U)   | 0.93     | C(29) - N(10) | 1.375    | C(29) - C(30) | 1.390(1) |
| C(29) - H(29) | 0.95     | C(29) - H(29) | 0.95     | C(30) - C(30) | 1.398(4) | C(29) - H(29) | 0.95     | C(29) - H(29) | 0.93     | C(29) - H(29) | 0.95     | C(V) - N(9)   | 1.369(6) | C(30) - C(30) | 1.402(6) | C(29) - H(29) | 0.95     |
| C(30) - C(31) | 1.383(4) | C(30) - C(31) | 1.391(3) | C(30) - C(31) | 1.384(4) | C(30) - C(31) | 1.392(4) | C(30) - C(31) | 1.381(7) | C(30) - C(31) | 1.391(2) | C(V) - N(40)  | 1.330    | C(30) - C(31) | 1.397(6) | C(30) - C(31) | 1.388(8) |
| C(30) - H(30) | 0.95     | C(30) - H(30) | 0.95     | C(31) - C(32) | 1.395(4) | C(30) - H(30) | 0.95     | C(30) - H(30) | 0.93     | C(30) - H(30) | 0.95     | C(W) - N(6)   | 1.354(6) | C(31) - C(32) | 1.394(6) | C(30) - H(30) | 0.949    |
| C(31) - C(32) | 1.460(4) | C(31) - C(32) | 1.468(3) | C(31) - H(31) | 0.95     | C(31) - C(32) | 1.461(5) | C(31) - C(32) | 1.466(7) | C(31) - C(32) | 1.469(2) | C(W) - N(7)   | 1.355(6) | C(31) - H(31) | 0.95     | C(31) - C(32) | 1.455(9) |
| C(32) - N(9)  | 1.371(4) | C(32) - N(9)  | 1.369(2) | C(32) - C(32) | 1.384(4) | C(32) - N(9)  | 1.369(4) | C(32) - N(9)  | 1.364(6) | C(32) - N(6)  | 1.338(2) | C(X) - H(X)   | 0.93     | C(32) - C(32) | 1.395(6) | C(32) - N(9)  | 1.392(8) |
| C(32) - N(10) | 1.336    | C(32) - N(10) | 1.342(2) | C(32) - H(32) | 0.95     | C(32) - N(10) | 1.339    | C(32) - N(10) | 1.333    | C(32) - N(10) | 1.368(2) | C(Z) - H(Z)   | 0.93     | C32 - H(32)   | 0.951    | C(32) - N(10) | 1.317    |
| C(33) - Cl(1) | 1.769    | C(33) - Cl(1) | 1.768    | C(33) - Cl(1) | 1.768    | C(33) - Cl(1) | 1.769    | C33 - Cl(1)   | 1.702    | C(33) - Cl(2) | 1.768    | C(19) - Cl(1) | 1.765    | C(33) - Cl(1) | 1.772    | C(33) - Cl    | 1.763    |
| C(33) - H(33) | 0.99     | C(33) - H(33) | 0.97     | C(33) - H(33) | 0.99     | C(19) - H(19) | 0.971    | C(33) - H(33) | 0.99     | C(33) - H(33) | 0.99     |
